# Supplementary material for: Comprehensive Analysis of Glycolysis-Related Genes for Prognosis, Immune Features, and Candidate Drug Development in Colon Cancer
Source: Front Cell Dev Biol. 2021 Aug 6;9:684322. doi: 10.3389/fcell.2021.684322 (PMC8377503; doi:10.3389/fcell.2021.684322)
Supplement: Supplementary Table 2 — GO analysis of genes involved in differential glycolysis. [file Table_2.XLSX]

## Sheet: GO
GO analysis of genes involved in differential glycolysis
ONTOLOGY	ID	Description	GeneRatio	BgRatio	pvalue	p.adjust	qvalue	geneID	Count
BP	GO:0006096	glycolytic process	47/144	115/18670	3.5507e-71	8.93484e-68	6.42322e-68	NUP35/NUP37/HKDC1/RAE1/INS/PFKFB3/NDC1/NUP205/GCKR/DDIT4/PKM/ALDOC/NUP85/NUP43/NUP107/ENO1/OGT/GPI/NUP155/ENO3/MLXIPL/GAPDHS/NUP58/MYOG/NUP93/NUP210/PGK2/NUP188/GALK1/PFKFB4/PRKAG2/NCOR1/IGF1/PFKFB2/HDAC4/P2RX7/ARNT/ENTPD5/INSR/GCK/PPARGC1A/CBFA2T3/HK2/PGM1/PRKAA2/PPARA/OGDH	47
BP	GO:0006757	ATP generation from ADP	47/144	116/18670	5.93875e-71	8.93484e-68	6.42322e-68	NUP35/NUP37/HKDC1/RAE1/INS/PFKFB3/NDC1/NUP205/GCKR/DDIT4/PKM/ALDOC/NUP85/NUP43/NUP107/ENO1/OGT/GPI/NUP155/ENO3/MLXIPL/GAPDHS/NUP58/MYOG/NUP93/NUP210/PGK2/NUP188/GALK1/PFKFB4/PRKAG2/NCOR1/IGF1/PFKFB2/HDAC4/P2RX7/ARNT/ENTPD5/INSR/GCK/PPARGC1A/CBFA2T3/HK2/PGM1/PRKAA2/PPARA/OGDH	47
BP	GO:0042866	pyruvate biosynthetic process	47/144	119/18670	2.68494e-70	2.693e-67	1.93599e-67	NUP35/NUP37/HKDC1/RAE1/INS/PFKFB3/NDC1/NUP205/GCKR/DDIT4/PKM/ALDOC/NUP85/NUP43/NUP107/ENO1/OGT/GPI/NUP155/ENO3/MLXIPL/GAPDHS/NUP58/MYOG/NUP93/NUP210/PGK2/NUP188/GALK1/PFKFB4/PRKAG2/NCOR1/IGF1/PFKFB2/HDAC4/P2RX7/ARNT/ENTPD5/INSR/GCK/PPARGC1A/CBFA2T3/HK2/PGM1/PRKAA2/PPARA/OGDH	47
BP	GO:0006090	pyruvate metabolic process	50/144	154/18670	8.88405e-70	6.68303e-67	4.8044e-67	NUP35/NUP37/HKDC1/RAE1/INS/PFKFB3/NDC1/NUP205/GCKR/DDIT4/PKM/ME1/ALDOC/NUP85/NUP43/NUP107/ENO1/OGT/GPI/NUP155/ENO3/MLXIPL/GAPDHS/NUP58/MYOG/NUP93/NUP210/PGK2/NUP188/GALK1/PFKFB4/PRKAG2/NCOR1/IGF1/PFKFB2/HDAC4/ME2/PC/P2RX7/ARNT/ENTPD5/INSR/GCK/PPARGC1A/CBFA2T3/HK2/PGM1/PRKAA2/PPARA/OGDH	50
BP	GO:0046031	ADP metabolic process	47/144	126/18670	7.54438e-69	4.54021e-66	3.26394e-66	NUP35/NUP37/HKDC1/RAE1/INS/PFKFB3/NDC1/NUP205/GCKR/DDIT4/PKM/ALDOC/NUP85/NUP43/NUP107/ENO1/OGT/GPI/NUP155/ENO3/MLXIPL/GAPDHS/NUP58/MYOG/NUP93/NUP210/PGK2/NUP188/GALK1/PFKFB4/PRKAG2/NCOR1/IGF1/PFKFB2/HDAC4/P2RX7/ARNT/ENTPD5/INSR/GCK/PPARGC1A/CBFA2T3/HK2/PGM1/PRKAA2/PPARA/OGDH	47
BP	GO:0006165	nucleoside diphosphate phosphorylation	47/144	134/18670	2.58196e-67	1.29485e-64	9.30866e-65	NUP35/NUP37/HKDC1/RAE1/INS/PFKFB3/NDC1/NUP205/GCKR/DDIT4/PKM/ALDOC/NUP85/NUP43/NUP107/ENO1/OGT/GPI/NUP155/ENO3/MLXIPL/GAPDHS/NUP58/MYOG/NUP93/NUP210/PGK2/NUP188/GALK1/PFKFB4/PRKAG2/NCOR1/IGF1/PFKFB2/HDAC4/P2RX7/ARNT/ENTPD5/INSR/GCK/PPARGC1A/CBFA2T3/HK2/PGM1/PRKAA2/PPARA/OGDH	47
BP	GO:0046939	nucleotide phosphorylation	47/144	136/18670	5.99086e-67	2.57521e-64	1.85131e-64	NUP35/NUP37/HKDC1/RAE1/INS/PFKFB3/NDC1/NUP205/GCKR/DDIT4/PKM/ALDOC/NUP85/NUP43/NUP107/ENO1/OGT/GPI/NUP155/ENO3/MLXIPL/GAPDHS/NUP58/MYOG/NUP93/NUP210/PGK2/NUP188/GALK1/PFKFB4/PRKAG2/NCOR1/IGF1/PFKFB2/HDAC4/P2RX7/ARNT/ENTPD5/INSR/GCK/PPARGC1A/CBFA2T3/HK2/PGM1/PRKAA2/PPARA/OGDH	47
BP	GO:0009135	purine nucleoside diphosphate metabolic process	47/144	138/18670	1.36881e-66	4.57639e-64	3.28995e-64	NUP35/NUP37/HKDC1/RAE1/INS/PFKFB3/NDC1/NUP205/GCKR/DDIT4/PKM/ALDOC/NUP85/NUP43/NUP107/ENO1/OGT/GPI/NUP155/ENO3/MLXIPL/GAPDHS/NUP58/MYOG/NUP93/NUP210/PGK2/NUP188/GALK1/PFKFB4/PRKAG2/NCOR1/IGF1/PFKFB2/HDAC4/P2RX7/ARNT/ENTPD5/INSR/GCK/PPARGC1A/CBFA2T3/HK2/PGM1/PRKAA2/PPARA/OGDH	47
BP	GO:0009179	purine ribonucleoside diphosphate metabolic process	47/144	138/18670	1.36881e-66	4.57639e-64	3.28995e-64	NUP35/NUP37/HKDC1/RAE1/INS/PFKFB3/NDC1/NUP205/GCKR/DDIT4/PKM/ALDOC/NUP85/NUP43/NUP107/ENO1/OGT/GPI/NUP155/ENO3/MLXIPL/GAPDHS/NUP58/MYOG/NUP93/NUP210/PGK2/NUP188/GALK1/PFKFB4/PRKAG2/NCOR1/IGF1/PFKFB2/HDAC4/P2RX7/ARNT/ENTPD5/INSR/GCK/PPARGC1A/CBFA2T3/HK2/PGM1/PRKAA2/PPARA/OGDH	47
BP	GO:0009185	ribonucleoside diphosphate metabolic process	47/144	140/18670	3.08144e-66	9.27206e-64	6.66564e-64	NUP35/NUP37/HKDC1/RAE1/INS/PFKFB3/NDC1/NUP205/GCKR/DDIT4/PKM/ALDOC/NUP85/NUP43/NUP107/ENO1/OGT/GPI/NUP155/ENO3/MLXIPL/GAPDHS/NUP58/MYOG/NUP93/NUP210/PGK2/NUP188/GALK1/PFKFB4/PRKAG2/NCOR1/IGF1/PFKFB2/HDAC4/P2RX7/ARNT/ENTPD5/INSR/GCK/PPARGC1A/CBFA2T3/HK2/PGM1/PRKAA2/PPARA/OGDH	47
BP	GO:0019359	nicotinamide nucleotide biosynthetic process	47/144	147/18670	4.7274e-65	1.1854e-62	8.52176e-63	NUP35/NUP37/HKDC1/RAE1/INS/PFKFB3/NDC1/NUP205/GCKR/DDIT4/PKM/ALDOC/NUP85/NUP43/NUP107/ENO1/OGT/GPI/NUP155/ENO3/MLXIPL/GAPDHS/NUP58/MYOG/NUP93/NUP210/PGK2/NUP188/GALK1/PFKFB4/PRKAG2/NCOR1/IGF1/PFKFB2/HDAC4/P2RX7/ARNT/ENTPD5/INSR/GCK/PPARGC1A/CBFA2T3/HK2/PGM1/PRKAA2/PPARA/OGDH	47
BP	GO:0019363	pyridine nucleotide biosynthetic process	47/144	147/18670	4.7274e-65	1.1854e-62	8.52176e-63	NUP35/NUP37/HKDC1/RAE1/INS/PFKFB3/NDC1/NUP205/GCKR/DDIT4/PKM/ALDOC/NUP85/NUP43/NUP107/ENO1/OGT/GPI/NUP155/ENO3/MLXIPL/GAPDHS/NUP58/MYOG/NUP93/NUP210/PGK2/NUP188/GALK1/PFKFB4/PRKAG2/NCOR1/IGF1/PFKFB2/HDAC4/P2RX7/ARNT/ENTPD5/INSR/GCK/PPARGC1A/CBFA2T3/HK2/PGM1/PRKAA2/PPARA/OGDH	47
BP	GO:0072525	pyridine-containing compound biosynthetic process	47/144	150/18670	1.45113e-64	3.35881e-62	2.41464e-62	NUP35/NUP37/HKDC1/RAE1/INS/PFKFB3/NDC1/NUP205/GCKR/DDIT4/PKM/ALDOC/NUP85/NUP43/NUP107/ENO1/OGT/GPI/NUP155/ENO3/MLXIPL/GAPDHS/NUP58/MYOG/NUP93/NUP210/PGK2/NUP188/GALK1/PFKFB4/PRKAG2/NCOR1/IGF1/PFKFB2/HDAC4/P2RX7/ARNT/ENTPD5/INSR/GCK/PPARGC1A/CBFA2T3/HK2/PGM1/PRKAA2/PPARA/OGDH	47
BP	GO:0016052	carbohydrate catabolic process	50/144	199/18670	2.44876e-63	5.09031e-61	3.6594e-61	NUP35/NUP37/HKDC1/RAE1/INS/PFKFB3/NDC1/NUP205/GCKR/DDIT4/PKM/FUT8/ALDOC/NUP85/NUP43/NUP107/ENO1/OGT/GPI/NUP155/ENO3/MIOX/MLXIPL/GAPDHS/NUP58/MYOG/NUP93/NUP210/PGK2/NUP188/GALK1/PFKFB4/PRKAG2/NCOR1/IGF1/PFKFB2/HDAC4/P2RX7/ARNT/AGL/ENTPD5/INSR/GCK/PPARGC1A/CBFA2T3/HK2/PGM1/PRKAA2/PPARA/OGDH	50
BP	GO:0009132	nucleoside diphosphate metabolic process	47/144	158/18670	2.53754e-63	5.09031e-61	3.6594e-61	NUP35/NUP37/HKDC1/RAE1/INS/PFKFB3/NDC1/NUP205/GCKR/DDIT4/PKM/ALDOC/NUP85/NUP43/NUP107/ENO1/OGT/GPI/NUP155/ENO3/MLXIPL/GAPDHS/NUP58/MYOG/NUP93/NUP210/PGK2/NUP188/GALK1/PFKFB4/PRKAG2/NCOR1/IGF1/PFKFB2/HDAC4/P2RX7/ARNT/ENTPD5/INSR/GCK/PPARGC1A/CBFA2T3/HK2/PGM1/PRKAA2/PPARA/OGDH	47
BP	GO:0006754	ATP biosynthetic process	47/144	160/18670	5.04856e-63	9.49445e-61	6.82552e-61	NUP35/NUP37/HKDC1/RAE1/INS/PFKFB3/NDC1/NUP205/GCKR/DDIT4/PKM/ALDOC/NUP85/NUP43/NUP107/ENO1/OGT/GPI/NUP155/ENO3/MLXIPL/GAPDHS/NUP58/MYOG/NUP93/NUP210/PGK2/NUP188/GALK1/PFKFB4/PRKAG2/NCOR1/IGF1/PFKFB2/HDAC4/P2RX7/ARNT/ENTPD5/INSR/GCK/PPARGC1A/CBFA2T3/HK2/PGM1/PRKAA2/PPARA/OGDH	47
BP	GO:0019362	pyridine nucleotide metabolic process	49/144	189/18670	9.112e-63	1.52322e-60	1.09504e-60	NUP35/NUP37/HKDC1/RAE1/INS/PFKFB3/NDC1/NUP205/GCKR/DDIT4/PKM/ME1/ALDOC/NUP85/NUP43/NUP107/ENO1/OGT/GPI/NUP155/ENO3/MLXIPL/GAPDHS/NUP58/MYOG/NUP93/NUP210/PGK2/NUP188/GALK1/PFKFB4/PRKAG2/NCOR1/IGF1/PFKFB2/HDAC4/ME2/P2RX7/ARNT/ENTPD5/INSR/GCK/PPARGC1A/CBFA2T3/HK2/PGM1/PRKAA2/PPARA/OGDH	49
BP	GO:0046496	nicotinamide nucleotide metabolic process	49/144	189/18670	9.112e-63	1.52322e-60	1.09504e-60	NUP35/NUP37/HKDC1/RAE1/INS/PFKFB3/NDC1/NUP205/GCKR/DDIT4/PKM/ME1/ALDOC/NUP85/NUP43/NUP107/ENO1/OGT/GPI/NUP155/ENO3/MLXIPL/GAPDHS/NUP58/MYOG/NUP93/NUP210/PGK2/NUP188/GALK1/PFKFB4/PRKAG2/NCOR1/IGF1/PFKFB2/HDAC4/ME2/P2RX7/ARNT/ENTPD5/INSR/GCK/PPARGC1A/CBFA2T3/HK2/PGM1/PRKAA2/PPARA/OGDH	49
BP	GO:0072524	pyridine-containing compound metabolic process	49/144	195/18670	5.15244e-62	8.15984e-60	5.86607e-60	NUP35/NUP37/HKDC1/RAE1/INS/PFKFB3/NDC1/NUP205/GCKR/DDIT4/PKM/ME1/ALDOC/NUP85/NUP43/NUP107/ENO1/OGT/GPI/NUP155/ENO3/MLXIPL/GAPDHS/NUP58/MYOG/NUP93/NUP210/PGK2/NUP188/GALK1/PFKFB4/PRKAG2/NCOR1/IGF1/PFKFB2/HDAC4/ME2/P2RX7/ARNT/ENTPD5/INSR/GCK/PPARGC1A/CBFA2T3/HK2/PGM1/PRKAA2/PPARA/OGDH	49
BP	GO:0009156	ribonucleoside monophosphate biosynthetic process	49/144	197/18670	9.05253e-62	1.36195e-59	9.79103e-60	NUP35/NUP37/HKDC1/RAE1/INS/PFKFB3/NDC1/NUP205/GCKR/DDIT4/PKM/ALDOC/NUP85/NUP43/NUP107/ENO1/OGT/GPI/NUP155/ENO3/MLXIPL/GAPDHS/NUP58/MYOG/NUP93/NUP210/PGK2/NUP188/PRPS1/GALK1/PFKFB4/PRKAG2/NCOR1/IGF1/PFKFB2/HDAC4/P2RX7/ARNT/ENTPD5/INSR/GCK/LHPP/PPARGC1A/CBFA2T3/HK2/PGM1/PRKAA2/PPARA/OGDH	49
BP	GO:0009127	purine nucleoside monophosphate biosynthetic process	48/144	183/18670	1.04924e-61	1.43507e-59	1.03167e-59	NUP35/NUP37/HKDC1/RAE1/INS/PFKFB3/NDC1/NUP205/GCKR/DDIT4/PKM/ALDOC/NUP85/NUP43/NUP107/ENO1/OGT/GPI/NUP155/ENO3/MLXIPL/GAPDHS/NUP58/MYOG/NUP93/NUP210/PGK2/NUP188/GALK1/PFKFB4/PRKAG2/NCOR1/IGF1/PFKFB2/HDAC4/P2RX7/ARNT/ENTPD5/INSR/GCK/LHPP/PPARGC1A/CBFA2T3/HK2/PGM1/PRKAA2/PPARA/OGDH	48
BP	GO:0009168	purine ribonucleoside monophosphate biosynthetic process	48/144	183/18670	1.04924e-61	1.43507e-59	1.03167e-59	NUP35/NUP37/HKDC1/RAE1/INS/PFKFB3/NDC1/NUP205/GCKR/DDIT4/PKM/ALDOC/NUP85/NUP43/NUP107/ENO1/OGT/GPI/NUP155/ENO3/MLXIPL/GAPDHS/NUP58/MYOG/NUP93/NUP210/PGK2/NUP188/GALK1/PFKFB4/PRKAG2/NCOR1/IGF1/PFKFB2/HDAC4/P2RX7/ARNT/ENTPD5/INSR/GCK/LHPP/PPARGC1A/CBFA2T3/HK2/PGM1/PRKAA2/PPARA/OGDH	48
BP	GO:0009206	purine ribonucleoside triphosphate biosynthetic process	47/144	171/18670	1.86032e-61	2.43378e-59	1.74964e-59	NUP35/NUP37/HKDC1/RAE1/INS/PFKFB3/NDC1/NUP205/GCKR/DDIT4/PKM/ALDOC/NUP85/NUP43/NUP107/ENO1/OGT/GPI/NUP155/ENO3/MLXIPL/GAPDHS/NUP58/MYOG/NUP93/NUP210/PGK2/NUP188/GALK1/PFKFB4/PRKAG2/NCOR1/IGF1/PFKFB2/HDAC4/P2RX7/ARNT/ENTPD5/INSR/GCK/PPARGC1A/CBFA2T3/HK2/PGM1/PRKAA2/PPARA/OGDH	47
BP	GO:0009145	purine nucleoside triphosphate biosynthetic process	47/144	172/18670	2.54666e-61	3.19288e-59	2.29535e-59	NUP35/NUP37/HKDC1/RAE1/INS/PFKFB3/NDC1/NUP205/GCKR/DDIT4/PKM/ALDOC/NUP85/NUP43/NUP107/ENO1/OGT/GPI/NUP155/ENO3/MLXIPL/GAPDHS/NUP58/MYOG/NUP93/NUP210/PGK2/NUP188/GALK1/PFKFB4/PRKAG2/NCOR1/IGF1/PFKFB2/HDAC4/P2RX7/ARNT/ENTPD5/INSR/GCK/PPARGC1A/CBFA2T3/HK2/PGM1/PRKAA2/PPARA/OGDH	47
BP	GO:0009201	ribonucleoside triphosphate biosynthetic process	47/144	177/18670	1.18577e-60	1.42719e-58	1.026e-58	NUP35/NUP37/HKDC1/RAE1/INS/PFKFB3/NDC1/NUP205/GCKR/DDIT4/PKM/ALDOC/NUP85/NUP43/NUP107/ENO1/OGT/GPI/NUP155/ENO3/MLXIPL/GAPDHS/NUP58/MYOG/NUP93/NUP210/PGK2/NUP188/GALK1/PFKFB4/PRKAG2/NCOR1/IGF1/PFKFB2/HDAC4/P2RX7/ARNT/ENTPD5/INSR/GCK/PPARGC1A/CBFA2T3/HK2/PGM1/PRKAA2/PPARA/OGDH	47
BP	GO:0006733	oxidoreduction coenzyme metabolic process	49/144	207/18670	1.37506e-60	1.59137e-58	1.14403e-58	NUP35/NUP37/HKDC1/RAE1/INS/PFKFB3/NDC1/NUP205/GCKR/DDIT4/PKM/ME1/ALDOC/NUP85/NUP43/NUP107/ENO1/OGT/GPI/NUP155/ENO3/MLXIPL/GAPDHS/NUP58/MYOG/NUP93/NUP210/PGK2/NUP188/GALK1/PFKFB4/PRKAG2/NCOR1/IGF1/PFKFB2/HDAC4/ME2/P2RX7/ARNT/ENTPD5/INSR/GCK/PPARGC1A/CBFA2T3/HK2/PGM1/PRKAA2/PPARA/OGDH	49
BP	GO:0009124	nucleoside monophosphate biosynthetic process	49/144	208/18670	1.78976e-60	1.99459e-58	1.4339e-58	NUP35/NUP37/HKDC1/RAE1/INS/PFKFB3/NDC1/NUP205/GCKR/DDIT4/PKM/ALDOC/NUP85/NUP43/NUP107/ENO1/OGT/GPI/NUP155/ENO3/MLXIPL/GAPDHS/NUP58/MYOG/NUP93/NUP210/PGK2/NUP188/PRPS1/GALK1/PFKFB4/PRKAG2/NCOR1/IGF1/PFKFB2/HDAC4/P2RX7/ARNT/ENTPD5/INSR/GCK/LHPP/PPARGC1A/CBFA2T3/HK2/PGM1/PRKAA2/PPARA/OGDH	49
BP	GO:0009166	nucleotide catabolic process	47/144	182/18670	5.24785e-60	5.63957e-58	4.05426e-58	NUP35/NUP37/HKDC1/RAE1/INS/PFKFB3/NDC1/NUP205/GCKR/DDIT4/PKM/ALDOC/NUP85/NUP43/NUP107/ENO1/OGT/GPI/NUP155/ENO3/MLXIPL/GAPDHS/NUP58/MYOG/NUP93/NUP210/PGK2/NUP188/GALK1/PFKFB4/PRKAG2/NCOR1/IGF1/PFKFB2/HDAC4/P2RX7/ARNT/ENTPD5/INSR/GCK/PPARGC1A/CBFA2T3/HK2/PGM1/PRKAA2/PPARA/OGDH	47
BP	GO:0009142	nucleoside triphosphate biosynthetic process	47/144	188/18670	2.93777e-59	2.94658e-57	2.11828e-57	NUP35/NUP37/HKDC1/RAE1/INS/PFKFB3/NDC1/NUP205/GCKR/DDIT4/PKM/ALDOC/NUP85/NUP43/NUP107/ENO1/OGT/GPI/NUP155/ENO3/MLXIPL/GAPDHS/NUP58/MYOG/NUP93/NUP210/PGK2/NUP188/GALK1/PFKFB4/PRKAG2/NCOR1/IGF1/PFKFB2/HDAC4/P2RX7/ARNT/ENTPD5/INSR/GCK/PPARGC1A/CBFA2T3/HK2/PGM1/PRKAA2/PPARA/OGDH	47
BP	GO:1901292	nucleoside phosphate catabolic process	47/144	188/18670	2.93777e-59	2.94658e-57	2.11828e-57	NUP35/NUP37/HKDC1/RAE1/INS/PFKFB3/NDC1/NUP205/GCKR/DDIT4/PKM/ALDOC/NUP85/NUP43/NUP107/ENO1/OGT/GPI/NUP155/ENO3/MLXIPL/GAPDHS/NUP58/MYOG/NUP93/NUP210/PGK2/NUP188/GALK1/PFKFB4/PRKAG2/NCOR1/IGF1/PFKFB2/HDAC4/P2RX7/ARNT/ENTPD5/INSR/GCK/PPARGC1A/CBFA2T3/HK2/PGM1/PRKAA2/PPARA/OGDH	47
BP	GO:0051196	regulation of coenzyme metabolic process	38/144	95/18670	8.8705e-57	8.61011e-55	6.18977e-55	NUP35/NUP37/RAE1/INS/PFKFB3/NDC1/NUP205/GCKR/DDIT4/ME1/NUP85/NUP43/NUP107/OGT/NUP155/MLXIPL/GAPDHS/NUP58/MYOG/NUP93/NUP210/NUP188/PFKFB4/PRKAG2/NCOR1/IGF1/PFKFB2/HDAC4/ME2/P2RX7/ARNT/ENTPD5/INSR/GCK/PPARGC1A/CBFA2T3/PRKAA2/PPARA	38
BP	GO:0006110	regulation of glycolytic process	36/144	79/18670	2.34383e-56	2.20394e-54	1.5844e-54	NUP35/NUP37/RAE1/INS/PFKFB3/NDC1/NUP205/GCKR/DDIT4/NUP85/NUP43/NUP107/OGT/NUP155/MLXIPL/GAPDHS/NUP58/MYOG/NUP93/NUP210/NUP188/PFKFB4/PRKAG2/NCOR1/IGF1/PFKFB2/HDAC4/P2RX7/ARNT/ENTPD5/INSR/GCK/PPARGC1A/CBFA2T3/PRKAA2/PPARA	36
BP	GO:0030811	regulation of nucleotide catabolic process	36/144	81/18670	7.58427e-56	6.91548e-54	4.97151e-54	NUP35/NUP37/RAE1/INS/PFKFB3/NDC1/NUP205/GCKR/DDIT4/NUP85/NUP43/NUP107/OGT/NUP155/MLXIPL/GAPDHS/NUP58/MYOG/NUP93/NUP210/NUP188/PFKFB4/PRKAG2/NCOR1/IGF1/PFKFB2/HDAC4/P2RX7/ARNT/ENTPD5/INSR/GCK/PPARGC1A/CBFA2T3/PRKAA2/PPARA	36
BP	GO:0006140	regulation of nucleotide metabolic process	42/144	146/18670	1.14842e-55	1.01635e-53	7.30652e-54	NUP35/NUP37/CDK1/RAE1/INS/PFKFB3/NDC1/NUP205/GCKR/DDIT4/ME1/NUP85/NUP43/NUP107/ENO1/OGT/NUP155/MLXIPL/GAPDHS/NUP58/MYOG/NUP93/NUP210/PGK2/NUP188/PFKFB4/PRKAG2/ADORA2B/NCOR1/IGF1/PFKFB2/HDAC4/ME2/P2RX7/ARNT/ENTPD5/INSR/GCK/PPARGC1A/CBFA2T3/PRKAA2/PPARA	42
BP	GO:0034404	nucleobase-containing small molecule biosynthetic process	47/144	226/18670	4.33675e-55	3.72836e-53	2.6803e-53	NUP35/NUP37/HKDC1/RAE1/INS/PFKFB3/NDC1/NUP205/GCKR/DDIT4/PKM/ALDOC/NUP85/NUP43/NUP107/ENO1/OGT/GPI/NUP155/ENO3/MLXIPL/GAPDHS/NUP58/MYOG/NUP93/NUP210/PGK2/NUP188/GALK1/PFKFB4/PRKAG2/NCOR1/IGF1/PFKFB2/HDAC4/P2RX7/ARNT/ENTPD5/INSR/GCK/PPARGC1A/CBFA2T3/HK2/PGM1/PRKAA2/PPARA/OGDH	47
BP	GO:2001169	regulation of ATP biosynthetic process	37/144	96/18670	1.62383e-54	1.35725e-52	9.7572e-53	NUP35/NUP37/RAE1/INS/PFKFB3/NDC1/NUP205/GCKR/DDIT4/NUP85/NUP43/NUP107/ENO1/OGT/NUP155/MLXIPL/GAPDHS/NUP58/MYOG/NUP93/NUP210/NUP188/PFKFB4/PRKAG2/NCOR1/IGF1/PFKFB2/HDAC4/P2RX7/ARNT/ENTPD5/INSR/GCK/PPARGC1A/CBFA2T3/PRKAA2/PPARA	37
BP	GO:0043470	regulation of carbohydrate catabolic process	36/144	88/18670	3.45889e-54	2.81291e-52	2.02219e-52	NUP35/NUP37/RAE1/INS/PFKFB3/NDC1/NUP205/GCKR/DDIT4/NUP85/NUP43/NUP107/OGT/NUP155/MLXIPL/GAPDHS/NUP58/MYOG/NUP93/NUP210/NUP188/PFKFB4/PRKAG2/NCOR1/IGF1/PFKFB2/HDAC4/P2RX7/ARNT/ENTPD5/INSR/GCK/PPARGC1A/CBFA2T3/PRKAA2/PPARA	36
BP	GO:1903578	regulation of ATP metabolic process	39/144	122/18670	1.10353e-53	8.7382e-52	6.28186e-52	NUP35/NUP37/CDK1/RAE1/INS/PFKFB3/NDC1/NUP205/GCKR/DDIT4/NUP85/NUP43/NUP107/ENO1/OGT/NUP155/MLXIPL/GAPDHS/NUP58/MYOG/NUP93/NUP210/PGK2/NUP188/PFKFB4/PRKAG2/NCOR1/IGF1/PFKFB2/HDAC4/P2RX7/ARNT/ENTPD5/INSR/GCK/PPARGC1A/CBFA2T3/PRKAA2/PPARA	39
BP	GO:0046434	organophosphate catabolic process	47/144	248/18670	4.97327e-53	3.83707e-51	2.75845e-51	NUP35/NUP37/HKDC1/RAE1/INS/PFKFB3/NDC1/NUP205/GCKR/DDIT4/PKM/ALDOC/NUP85/NUP43/NUP107/ENO1/OGT/GPI/NUP155/ENO3/MLXIPL/GAPDHS/NUP58/MYOG/NUP93/NUP210/PGK2/NUP188/GALK1/PFKFB4/PRKAG2/NCOR1/IGF1/PFKFB2/HDAC4/P2RX7/ARNT/ENTPD5/INSR/GCK/PPARGC1A/CBFA2T3/HK2/PGM1/PRKAA2/PPARA/OGDH	47
BP	GO:1900371	regulation of purine nucleotide biosynthetic process	38/144	117/18670	1.36601e-52	1.02758e-50	7.38721e-51	NUP35/NUP37/RAE1/INS/PFKFB3/NDC1/NUP205/GCKR/DDIT4/NUP85/NUP43/NUP107/ENO1/OGT/NUP155/MLXIPL/GAPDHS/NUP58/MYOG/NUP93/NUP210/NUP188/PFKFB4/PRKAG2/ADORA2B/NCOR1/IGF1/PFKFB2/HDAC4/P2RX7/ARNT/ENTPD5/INSR/GCK/PPARGC1A/CBFA2T3/PRKAA2/PPARA	38
BP	GO:1900542	regulation of purine nucleotide metabolic process	40/144	142/18670	1.57555e-52	1.1563e-50	8.31257e-51	NUP35/NUP37/CDK1/RAE1/INS/PFKFB3/NDC1/NUP205/GCKR/DDIT4/NUP85/NUP43/NUP107/ENO1/OGT/NUP155/MLXIPL/GAPDHS/NUP58/MYOG/NUP93/NUP210/PGK2/NUP188/PFKFB4/PRKAG2/ADORA2B/NCOR1/IGF1/PFKFB2/HDAC4/P2RX7/ARNT/ENTPD5/INSR/GCK/PPARGC1A/CBFA2T3/PRKAA2/PPARA	40
BP	GO:0030808	regulation of nucleotide biosynthetic process	38/144	118/18670	2.00365e-52	1.43547e-50	1.03195e-50	NUP35/NUP37/RAE1/INS/PFKFB3/NDC1/NUP205/GCKR/DDIT4/NUP85/NUP43/NUP107/ENO1/OGT/NUP155/MLXIPL/GAPDHS/NUP58/MYOG/NUP93/NUP210/NUP188/PFKFB4/PRKAG2/ADORA2B/NCOR1/IGF1/PFKFB2/HDAC4/P2RX7/ARNT/ENTPD5/INSR/GCK/PPARGC1A/CBFA2T3/PRKAA2/PPARA	38
BP	GO:0051193	regulation of cofactor metabolic process	38/144	119/18670	2.92725e-52	2.04839e-50	1.47258e-50	NUP35/NUP37/RAE1/INS/PFKFB3/NDC1/NUP205/GCKR/DDIT4/ME1/NUP85/NUP43/NUP107/OGT/NUP155/MLXIPL/GAPDHS/NUP58/MYOG/NUP93/NUP210/NUP188/PFKFB4/PRKAG2/NCOR1/IGF1/PFKFB2/HDAC4/ME2/P2RX7/ARNT/ENTPD5/INSR/GCK/PPARGC1A/CBFA2T3/PRKAA2/PPARA	38
BP	GO:0006164	purine nucleotide biosynthetic process	49/144	300/18670	5.17717e-52	3.54048e-50	2.54523e-50	NUP35/NUP37/HKDC1/RAE1/INS/PFKFB3/NDC1/NUP205/GCKR/DDIT4/PKM/ALDOC/NUP85/NUP43/NUP107/ENO1/OGT/GPI/NUP155/ENO3/MLXIPL/GAPDHS/NUP58/MYOG/NUP93/NUP210/PGK2/NUP188/PRPS1/GALK1/PFKFB4/PRKAG2/ADORA2B/NCOR1/IGF1/PFKFB2/HDAC4/P2RX7/ARNT/ENTPD5/INSR/GCK/PPARGC1A/CBFA2T3/HK2/PGM1/PRKAA2/PPARA/OGDH	49
BP	GO:0009108	coenzyme biosynthetic process	47/144	261/18670	6.57619e-52	4.39728e-50	3.16118e-50	NUP35/NUP37/HKDC1/RAE1/INS/PFKFB3/NDC1/NUP205/GCKR/DDIT4/PKM/ALDOC/NUP85/NUP43/NUP107/ENO1/OGT/GPI/NUP155/ENO3/MLXIPL/GAPDHS/NUP58/MYOG/NUP93/NUP210/PGK2/NUP188/GALK1/PFKFB4/PRKAG2/NCOR1/IGF1/PFKFB2/HDAC4/P2RX7/ARNT/ENTPD5/INSR/GCK/PPARGC1A/CBFA2T3/HK2/PGM1/PRKAA2/PPARA/OGDH	47
BP	GO:0072522	purine-containing compound biosynthetic process	49/144	313/18670	4.64876e-51	3.0409e-49	2.18609e-49	NUP35/NUP37/HKDC1/RAE1/INS/PFKFB3/NDC1/NUP205/GCKR/DDIT4/PKM/ALDOC/NUP85/NUP43/NUP107/ENO1/OGT/GPI/NUP155/ENO3/MLXIPL/GAPDHS/NUP58/MYOG/NUP93/NUP210/PGK2/NUP188/PRPS1/GALK1/PFKFB4/PRKAG2/ADORA2B/NCOR1/IGF1/PFKFB2/HDAC4/P2RX7/ARNT/ENTPD5/INSR/GCK/PPARGC1A/CBFA2T3/HK2/PGM1/PRKAA2/PPARA/OGDH	49
BP	GO:0046394	carboxylic acid biosynthetic process	55/144	462/18670	6.37992e-51	4.08451e-49	2.93634e-49	NUP35/NUP37/NANP/HKDC1/RAE1/INS/PFKFB3/MIF/NDC1/NUP205/GCKR/DDIT4/PKM/ALDOC/VCAN/NUP85/NUP43/NUP107/ENO1/OGT/GPI/NUP155/ENO3/MLXIPL/GAPDHS/NUP58/MYOG/NUP93/NUP210/PGK2/NUP188/GALK1/PLOD1/PFKFB4/PRKAG2/PLOD2/NCOR1/IGF1/PFKFB2/HDAC4/P2RX7/ARNT/ENTPD5/DCN/INSR/GCK/PPARGC1A/CBFA2T3/GOT1/HK2/PGM1/UGP2/PRKAA2/PPARA/OGDH	55
BP	GO:0016053	organic acid biosynthetic process	55/144	463/18670	7.20524e-51	4.51678e-49	3.2471e-49	NUP35/NUP37/NANP/HKDC1/RAE1/INS/PFKFB3/MIF/NDC1/NUP205/GCKR/DDIT4/PKM/ALDOC/VCAN/NUP85/NUP43/NUP107/ENO1/OGT/GPI/NUP155/ENO3/MLXIPL/GAPDHS/NUP58/MYOG/NUP93/NUP210/PGK2/NUP188/GALK1/PLOD1/PFKFB4/PRKAG2/PLOD2/NCOR1/IGF1/PFKFB2/HDAC4/P2RX7/ARNT/ENTPD5/DCN/INSR/GCK/PPARGC1A/CBFA2T3/GOT1/HK2/PGM1/UGP2/PRKAA2/PPARA/OGDH	55
BP	GO:0072330	monocarboxylic acid biosynthetic process	50/144	343/18670	1.56034e-50	9.58178e-49	6.8883e-49	NUP35/NUP37/HKDC1/RAE1/INS/PFKFB3/MIF/NDC1/NUP205/GCKR/DDIT4/PKM/ALDOC/VCAN/NUP85/NUP43/NUP107/ENO1/OGT/GPI/NUP155/ENO3/MLXIPL/GAPDHS/NUP58/MYOG/NUP93/NUP210/PGK2/NUP188/GALK1/PFKFB4/PRKAG2/NCOR1/IGF1/PFKFB2/HDAC4/P2RX7/ARNT/ENTPD5/DCN/INSR/GCK/PPARGC1A/CBFA2T3/HK2/PGM1/PRKAA2/PPARA/OGDH	50
BP	GO:0046390	ribose phosphate biosynthetic process	48/144	300/18670	1.91816e-50	1.15435e-48	8.29855e-49	NUP35/NUP37/HKDC1/RAE1/INS/PFKFB3/NDC1/NUP205/GCKR/DDIT4/PKM/ALDOC/NUP85/NUP43/NUP107/ENO1/OGT/GPI/NUP155/ENO3/MLXIPL/GAPDHS/NUP58/MYOG/NUP93/NUP210/PGK2/NUP188/PRPS1/GALK1/PFKFB4/PRKAG2/NCOR1/IGF1/PFKFB2/HDAC4/P2RX7/ARNT/ENTPD5/INSR/GCK/PPARGC1A/CBFA2T3/HK2/PGM1/PRKAA2/PPARA/OGDH	48
BP	GO:0009152	purine ribonucleotide biosynthetic process	47/144	280/18670	2.22735e-50	1.31414e-48	9.44729e-49	NUP35/NUP37/HKDC1/RAE1/INS/PFKFB3/NDC1/NUP205/GCKR/DDIT4/PKM/ALDOC/NUP85/NUP43/NUP107/ENO1/OGT/GPI/NUP155/ENO3/MLXIPL/GAPDHS/NUP58/MYOG/NUP93/NUP210/PGK2/NUP188/GALK1/PFKFB4/PRKAG2/NCOR1/IGF1/PFKFB2/HDAC4/P2RX7/ARNT/ENTPD5/INSR/GCK/PPARGC1A/CBFA2T3/HK2/PGM1/PRKAA2/PPARA/OGDH	47
BP	GO:0046034	ATP metabolic process	48/144	305/18670	4.42863e-50	2.56264e-48	1.84227e-48	NUP35/NUP37/HKDC1/CDK1/RAE1/INS/PFKFB3/NDC1/NUP205/GCKR/DDIT4/PKM/ALDOC/NUP85/NUP43/NUP107/ENO1/OGT/GPI/NUP155/ENO3/MLXIPL/GAPDHS/NUP58/MYOG/NUP93/NUP210/PGK2/NUP188/GALK1/PFKFB4/PRKAG2/NCOR1/IGF1/PFKFB2/HDAC4/P2RX7/ARNT/ENTPD5/INSR/GCK/PPARGC1A/CBFA2T3/HK2/PGM1/PRKAA2/PPARA/OGDH	48
BP	GO:0009161	ribonucleoside monophosphate metabolic process	50/144	354/18670	8.08948e-50	4.59269e-48	3.30166e-48	NUP35/NUP37/HKDC1/CDK1/RAE1/INS/PFKFB3/NDC1/NUP205/GCKR/DDIT4/PKM/ALDOC/NUP85/NUP43/NUP107/ENO1/OGT/GPI/NUP155/ENO3/MLXIPL/GAPDHS/NUP58/MYOG/NUP93/NUP210/PGK2/NUP188/PRPS1/GALK1/PFKFB4/PRKAG2/NCOR1/IGF1/PFKFB2/HDAC4/P2RX7/ARNT/ENTPD5/INSR/GCK/LHPP/PPARGC1A/CBFA2T3/HK2/PGM1/PRKAA2/PPARA/OGDH	50
BP	GO:0009260	ribonucleotide biosynthetic process	47/144	293/18670	2.13056e-49	1.1872e-47	8.5347e-48	NUP35/NUP37/HKDC1/RAE1/INS/PFKFB3/NDC1/NUP205/GCKR/DDIT4/PKM/ALDOC/NUP85/NUP43/NUP107/ENO1/OGT/GPI/NUP155/ENO3/MLXIPL/GAPDHS/NUP58/MYOG/NUP93/NUP210/PGK2/NUP188/GALK1/PFKFB4/PRKAG2/NCOR1/IGF1/PFKFB2/HDAC4/P2RX7/ARNT/ENTPD5/INSR/GCK/PPARGC1A/CBFA2T3/HK2/PGM1/PRKAA2/PPARA/OGDH	47
BP	GO:0009167	purine ribonucleoside monophosphate metabolic process	49/144	340/18670	3.25525e-49	1.78092e-47	1.28029e-47	NUP35/NUP37/HKDC1/CDK1/RAE1/INS/PFKFB3/NDC1/NUP205/GCKR/DDIT4/PKM/ALDOC/NUP85/NUP43/NUP107/ENO1/OGT/GPI/NUP155/ENO3/MLXIPL/GAPDHS/NUP58/MYOG/NUP93/NUP210/PGK2/NUP188/GALK1/PFKFB4/PRKAG2/NCOR1/IGF1/PFKFB2/HDAC4/P2RX7/ARNT/ENTPD5/INSR/GCK/LHPP/PPARGC1A/CBFA2T3/HK2/PGM1/PRKAA2/PPARA/OGDH	49
BP	GO:0009126	purine nucleoside monophosphate metabolic process	49/144	341/18670	3.78222e-49	2.03227e-47	1.46099e-47	NUP35/NUP37/HKDC1/CDK1/RAE1/INS/PFKFB3/NDC1/NUP205/GCKR/DDIT4/PKM/ALDOC/NUP85/NUP43/NUP107/ENO1/OGT/GPI/NUP155/ENO3/MLXIPL/GAPDHS/NUP58/MYOG/NUP93/NUP210/PGK2/NUP188/GALK1/PFKFB4/PRKAG2/NCOR1/IGF1/PFKFB2/HDAC4/P2RX7/ARNT/ENTPD5/INSR/GCK/LHPP/PPARGC1A/CBFA2T3/HK2/PGM1/PRKAA2/PPARA/OGDH	49
BP	GO:1901293	nucleoside phosphate biosynthetic process	51/144	390/18670	4.1816e-49	2.20745e-47	1.58692e-47	NUP35/NUP37/HKDC1/RAE1/INS/PFKFB3/NDC1/NUP205/GCKR/DDIT4/PKM/ME1/ALDOC/NUP85/NUP43/NUP107/ENO1/OGT/GPI/NUP155/ENO3/MLXIPL/GAPDHS/NUP58/MYOG/NUP93/NUP210/PGK2/NUP188/PRPS1/GALK1/PFKFB4/PRKAG2/ADORA2B/NCOR1/IGF1/PFKFB2/HDAC4/P2RX7/ARNT/ENTPD5/INSR/GCK/LHPP/PPARGC1A/CBFA2T3/HK2/PGM1/PRKAA2/PPARA/OGDH	51
BP	GO:0043467	regulation of generation of precursor metabolites and energy	39/144	158/18670	1.20089e-48	6.23012e-47	4.47881e-47	NUP35/NUP37/CDK1/RAE1/INS/PFKFB3/NDC1/NUP205/GCKR/DDIT4/NUP85/NUP43/NUP107/OGT/NUP155/MLXIPL/GAPDHS/NUP58/MYOG/NUP93/NUP210/PGK2/NUP188/PFKFB4/IRS2/PRKAG2/NCOR1/IGF1/PFKFB2/HDAC4/P2RX7/ARNT/ENTPD5/INSR/GCK/PPARGC1A/CBFA2T3/PRKAA2/PPARA	39
BP	GO:0051188	cofactor biosynthetic process	48/144	326/18670	1.26682e-48	6.4608e-47	4.64464e-47	NUP35/NUP37/HKDC1/RAE1/INS/PFKFB3/NDC1/NUP205/GCKR/DDIT4/PKM/ALDOC/NUP85/NUP43/NUP107/ENO1/OGT/GPI/NUP155/ENO3/MLXIPL/GAPDHS/ABCB6/NUP58/MYOG/NUP93/NUP210/PGK2/NUP188/GALK1/PFKFB4/PRKAG2/NCOR1/IGF1/PFKFB2/HDAC4/P2RX7/ARNT/ENTPD5/INSR/GCK/PPARGC1A/CBFA2T3/HK2/PGM1/PRKAA2/PPARA/OGDH	48
BP	GO:0009123	nucleoside monophosphate metabolic process	50/144	375/18670	1.60692e-48	8.05871e-47	5.79338e-47	NUP35/NUP37/HKDC1/CDK1/RAE1/INS/PFKFB3/NDC1/NUP205/GCKR/DDIT4/PKM/ALDOC/NUP85/NUP43/NUP107/ENO1/OGT/GPI/NUP155/ENO3/MLXIPL/GAPDHS/NUP58/MYOG/NUP93/NUP210/PGK2/NUP188/PRPS1/GALK1/PFKFB4/PRKAG2/NCOR1/IGF1/PFKFB2/HDAC4/P2RX7/ARNT/ENTPD5/INSR/GCK/LHPP/PPARGC1A/CBFA2T3/HK2/PGM1/PRKAA2/PPARA/OGDH	50
BP	GO:0006732	coenzyme metabolic process	51/144	403/18670	2.34146e-48	1.15499e-46	8.30321e-47	NUP35/NUP37/HKDC1/RAE1/INS/PFKFB3/NDC1/NUP205/GCKR/DDIT4/PKM/ME1/ALDOC/NUP85/NUP43/NUP107/ENO1/OGT/GPI/NUP155/ENO3/MLXIPL/GAPDHS/NUP58/MYOG/NUP93/NUP210/PGK2/NUP188/GALK1/PFKFB4/PRKAG2/NCOR1/IGF1/PFKFB2/HDAC4/ME2/PC/CYB5A/P2RX7/ARNT/ENTPD5/INSR/GCK/PPARGC1A/CBFA2T3/HK2/PGM1/PRKAA2/PPARA/OGDH	51
BP	GO:0009205	purine ribonucleoside triphosphate metabolic process	48/144	335/18670	4.95518e-48	2.40486e-46	1.72884e-46	NUP35/NUP37/HKDC1/CDK1/RAE1/INS/PFKFB3/NDC1/NUP205/GCKR/DDIT4/PKM/ALDOC/NUP85/NUP43/NUP107/ENO1/OGT/GPI/NUP155/ENO3/MLXIPL/GAPDHS/NUP58/MYOG/NUP93/NUP210/PGK2/NUP188/GALK1/PFKFB4/PRKAG2/NCOR1/IGF1/PFKFB2/HDAC4/P2RX7/ARNT/ENTPD5/INSR/GCK/PPARGC1A/CBFA2T3/HK2/PGM1/PRKAA2/PPARA/OGDH	48
BP	GO:0009165	nucleotide biosynthetic process	50/144	386/18670	7.1451e-48	3.41263e-46	2.45333e-46	NUP35/NUP37/HKDC1/RAE1/INS/PFKFB3/NDC1/NUP205/GCKR/DDIT4/PKM/ME1/ALDOC/NUP85/NUP43/NUP107/ENO1/OGT/GPI/NUP155/ENO3/MLXIPL/GAPDHS/NUP58/MYOG/NUP93/NUP210/PGK2/NUP188/PRPS1/GALK1/PFKFB4/PRKAG2/ADORA2B/NCOR1/IGF1/PFKFB2/HDAC4/P2RX7/ARNT/ENTPD5/INSR/GCK/PPARGC1A/CBFA2T3/HK2/PGM1/PRKAA2/PPARA/OGDH	50
BP	GO:0009199	ribonucleoside triphosphate metabolic process	48/144	341/18670	1.2027e-47	5.65458e-46	4.06505e-46	NUP35/NUP37/HKDC1/CDK1/RAE1/INS/PFKFB3/NDC1/NUP205/GCKR/DDIT4/PKM/ALDOC/NUP85/NUP43/NUP107/ENO1/OGT/GPI/NUP155/ENO3/MLXIPL/GAPDHS/NUP58/MYOG/NUP93/NUP210/PGK2/NUP188/GALK1/PFKFB4/PRKAG2/NCOR1/IGF1/PFKFB2/HDAC4/P2RX7/ARNT/ENTPD5/INSR/GCK/PPARGC1A/CBFA2T3/HK2/PGM1/PRKAA2/PPARA/OGDH	48
BP	GO:0009144	purine nucleoside triphosphate metabolic process	48/144	342/18670	1.39189e-47	6.44338e-46	4.63212e-46	NUP35/NUP37/HKDC1/CDK1/RAE1/INS/PFKFB3/NDC1/NUP205/GCKR/DDIT4/PKM/ALDOC/NUP85/NUP43/NUP107/ENO1/OGT/GPI/NUP155/ENO3/MLXIPL/GAPDHS/NUP58/MYOG/NUP93/NUP210/PGK2/NUP188/GALK1/PFKFB4/PRKAG2/NCOR1/IGF1/PFKFB2/HDAC4/P2RX7/ARNT/ENTPD5/INSR/GCK/PPARGC1A/CBFA2T3/HK2/PGM1/PRKAA2/PPARA/OGDH	48
BP	GO:0009141	nucleoside triphosphate metabolic process	48/144	362/18670	2.34843e-46	1.07067e-44	7.697e-45	NUP35/NUP37/HKDC1/CDK1/RAE1/INS/PFKFB3/NDC1/NUP205/GCKR/DDIT4/PKM/ALDOC/NUP85/NUP43/NUP107/ENO1/OGT/GPI/NUP155/ENO3/MLXIPL/GAPDHS/NUP58/MYOG/NUP93/NUP210/PGK2/NUP188/GALK1/PFKFB4/PRKAG2/NCOR1/IGF1/PFKFB2/HDAC4/P2RX7/ARNT/ENTPD5/INSR/GCK/PPARGC1A/CBFA2T3/HK2/PGM1/PRKAA2/PPARA/OGDH	48
BP	GO:0006109	regulation of carbohydrate metabolic process	39/144	206/18670	1.03075e-43	4.62914e-42	3.32787e-42	NUP35/NUP37/RAE1/INS/PFKFB3/NDC1/NUP205/GCKR/DDIT4/NUP85/NUP43/NUP107/OGT/NUP155/MLXIPL/GAPDHS/NUP58/MYOG/NUP93/NUP210/NUP188/IGFBP3/PGP/PFKFB4/IRS2/PRKAG2/NCOR1/IGF1/PFKFB2/HDAC4/P2RX7/ARNT/ENTPD5/INSR/GCK/PPARGC1A/CBFA2T3/PRKAA2/PPARA	39
BP	GO:0062012	regulation of small molecule metabolic process	45/144	459/18670	2.42037e-37	1.07101e-35	7.69948e-36	NUP35/NUP37/CDK1/RAE1/INS/PFKFB3/NDC1/NUP205/GCKR/DDIT4/ME1/NUP85/NUP43/NUP107/ENO1/OGT/NUP155/MLXIPL/GAPDHS/NUP58/MYOG/NUP93/NUP210/PGK2/NUP188/IGFBP3/PGP/PFKFB4/IRS2/PRKAG2/ADORA2B/NCOR1/IGF1/PFKFB2/HDAC4/ME2/P2RX7/ARNT/ENTPD5/INSR/GCK/PPARGC1A/CBFA2T3/PRKAA2/PPARA	45
BP	GO:0019318	hexose metabolic process	31/144	249/18670	9.15069e-29	3.9905e-27	2.86875e-27	HKDC1/INS/PFKFB3/GCKR/PKM/FUT8/ALDOC/ENO1/OGT/GPI/ENO3/GAPDHS/PGK2/CHST1/GALK1/IGFBP3/PGP/PFKFB4/IRS2/IGF1/PFKFB2/PC/B4GALT1/INSR/GCK/PPARGC1A/GOT1/MPI/HK2/PGM1/PPARA	31
BP	GO:0005996	monosaccharide metabolic process	32/144	292/18670	6.70163e-28	2.88074e-26	2.07095e-26	HKDC1/INS/PFKFB3/GCKR/PKM/FUT8/ALDOC/ENO1/OGT/GPI/ENO3/GAPDHS/PGK2/CHST1/GALK1/IGFBP3/PGP/PFKFB4/IRS2/IGF1/PFKFB2/PC/CYB5A/B4GALT1/INSR/GCK/PPARGC1A/GOT1/MPI/HK2/PGM1/PPARA	32
BP	GO:0044262	cellular carbohydrate metabolic process	31/144	286/18670	6.99239e-27	2.96339e-25	2.13037e-25	HKDC1/INS/PFKFB3/IDUA/GCKR/DDIT4/OGT/MIOX/MYOG/GALK1/IGFBP3/PGP/PFKFB4/IRS2/PRKAG2/IGF1/PFKFB2/HDAC4/B4GALT1/AGL/INSR/GCK/GNE/EXT1/PPARGC1A/CBFA2T3/GOT1/HK2/PGM1/UGP2/PPARA	31
BP	GO:0045981	positive regulation of nucleotide metabolic process	18/144	57/18670	7.50131e-25	3.09198e-23	2.22281e-23	CDK1/INS/PFKFB3/ENO1/MLXIPL/GAPDHS/MYOG/PGK2/PFKFB4/ADORA2B/IGF1/PFKFB2/P2RX7/ARNT/ENTPD5/INSR/PPARGC1A/PRKAA2	18
BP	GO:1900544	positive regulation of purine nucleotide metabolic process	18/144	57/18670	7.50131e-25	3.09198e-23	2.22281e-23	CDK1/INS/PFKFB3/ENO1/MLXIPL/GAPDHS/MYOG/PGK2/PFKFB4/ADORA2B/IGF1/PFKFB2/P2RX7/ARNT/ENTPD5/INSR/PPARGC1A/PRKAA2	18
BP	GO:1903580	positive regulation of ATP metabolic process	17/144	47/18670	1.03022e-24	4.18908e-23	3.01152e-23	CDK1/INS/PFKFB3/ENO1/MLXIPL/GAPDHS/MYOG/PGK2/PFKFB4/IGF1/PFKFB2/P2RX7/ARNT/ENTPD5/INSR/PPARGC1A/PRKAA2	17
BP	GO:0030810	positive regulation of nucleotide biosynthetic process	15/144	46/18670	4.02065e-21	1.59186e-19	1.14438e-19	INS/PFKFB3/ENO1/MLXIPL/GAPDHS/PFKFB4/ADORA2B/IGF1/PFKFB2/P2RX7/ARNT/ENTPD5/INSR/PPARGC1A/PRKAA2	15
BP	GO:1900373	positive regulation of purine nucleotide biosynthetic process	15/144	46/18670	4.02065e-21	1.59186e-19	1.14438e-19	INS/PFKFB3/ENO1/MLXIPL/GAPDHS/PFKFB4/ADORA2B/IGF1/PFKFB2/P2RX7/ARNT/ENTPD5/INSR/PPARGC1A/PRKAA2	15
BP	GO:2001171	positive regulation of ATP biosynthetic process	14/144	36/18670	4.53653e-21	1.77278e-19	1.27445e-19	INS/PFKFB3/ENO1/MLXIPL/GAPDHS/PFKFB4/IGF1/PFKFB2/P2RX7/ARNT/ENTPD5/INSR/PPARGC1A/PRKAA2	14
BP	GO:0062013	positive regulation of small molecule metabolic process	21/144	153/18670	1.42329e-20	5.49061e-19	3.94718e-19	CDK1/INS/PFKFB3/ENO1/MLXIPL/GAPDHS/MYOG/PGK2/PFKFB4/IRS2/ADORA2B/IGF1/PFKFB2/P2RX7/ARNT/ENTPD5/INSR/GCK/PPARGC1A/PRKAA2/PPARA	21
BP	GO:0006006	glucose metabolic process	23/144	209/18670	3.19971e-20	1.21873e-18	8.76137e-19	INS/GCKR/PKM/ALDOC/ENO1/OGT/GPI/ENO3/GAPDHS/PGK2/IGFBP3/PGP/IRS2/IGF1/PFKFB2/PC/INSR/GCK/PPARGC1A/GOT1/HK2/PGM1/PPARA	23
BP	GO:0045821	positive regulation of glycolytic process	12/144	23/18670	3.49367e-20	1.31406e-18	9.44669e-19	INS/PFKFB3/MLXIPL/GAPDHS/PFKFB4/IGF1/PFKFB2/P2RX7/ARNT/ENTPD5/INSR/PRKAA2	12
BP	GO:0016051	carbohydrate biosynthetic process	23/144	214/18670	5.50611e-20	2.04542e-18	1.47044e-18	INS/FUT8/ALDOC/ENO1/OGT/GPI/ENO3/GAPDHS/PGK2/PGP/IRS2/IGF1/PC/B4GALT1/AGL/INSR/GCK/EXT1/PPARGC1A/GOT1/PGM1/UGP2/PPARA	23
BP	GO:0030813	positive regulation of nucleotide catabolic process	12/144	25/18670	1.32622e-19	4.80796e-18	3.45642e-18	INS/PFKFB3/MLXIPL/GAPDHS/PFKFB4/IGF1/PFKFB2/P2RX7/ARNT/ENTPD5/INSR/PRKAA2	12
BP	GO:0051197	positive regulation of coenzyme metabolic process	12/144	25/18670	1.32622e-19	4.80796e-18	3.45642e-18	INS/PFKFB3/MLXIPL/GAPDHS/PFKFB4/IGF1/PFKFB2/P2RX7/ARNT/ENTPD5/INSR/PRKAA2	12
BP	GO:0006409	tRNA export from nucleus	13/144	34/18670	1.58914e-19	5.62557e-18	4.0442e-18	NUP35/NUP37/RAE1/NDC1/NUP205/NUP85/NUP43/NUP107/NUP155/NUP58/NUP93/NUP210/NUP188	13
BP	GO:0071431	tRNA-containing ribonucleoprotein complex export from nucleus	13/144	34/18670	1.58914e-19	5.62557e-18	4.0442e-18	NUP35/NUP37/RAE1/NDC1/NUP205/NUP85/NUP43/NUP107/NUP155/NUP58/NUP93/NUP210/NUP188	13
BP	GO:0051031	tRNA transport	13/144	36/18670	3.9057e-19	1.36654e-17	9.82402e-18	NUP35/NUP37/RAE1/NDC1/NUP205/NUP85/NUP43/NUP107/NUP155/NUP58/NUP93/NUP210/NUP188	13
BP	GO:0097064	ncRNA export from nucleus	13/144	38/18670	9.03337e-19	3.1243e-17	2.24605e-17	NUP35/NUP37/RAE1/NDC1/NUP205/NUP85/NUP43/NUP107/NUP155/NUP58/NUP93/NUP210/NUP188	13
BP	GO:0045913	positive regulation of carbohydrate metabolic process	16/144	83/18670	2.22574e-18	7.61052e-17	5.47117e-17	INS/PFKFB3/MLXIPL/GAPDHS/PFKFB4/IRS2/IGF1/PFKFB2/P2RX7/ARNT/ENTPD5/INSR/GCK/PPARGC1A/PRKAA2/PPARA	16
BP	GO:0051194	positive regulation of cofactor metabolic process	12/144	33/18670	8.58668e-18	2.90307e-16	2.087e-16	INS/PFKFB3/MLXIPL/GAPDHS/PFKFB4/IGF1/PFKFB2/P2RX7/ARNT/ENTPD5/INSR/PRKAA2	12
BP	GO:0016925	protein sumoylation	15/144	82/18670	6.19469e-17	2.07109e-15	1.4889e-15	NUP35/NUP37/RAE1/NDC1/NUP205/NUP85/NUP43/NUP107/NUP155/NUP58/NUP93/NUP210/NUP188/HDAC4/ARNT	15
BP	GO:0006094	gluconeogenesis	15/144	89/18670	2.2661e-16	7.49306e-15	5.38673e-15	INS/ALDOC/ENO1/OGT/GPI/ENO3/GAPDHS/PGK2/PGP/PC/GCK/PPARGC1A/GOT1/PGM1/PPARA	15
BP	GO:0030203	glycosaminoglycan metabolic process	18/144	160/18670	3.40235e-16	1.11279e-14	7.9998e-15	AGRN/IDUA/CHPF/HS6ST2/VCAN/GPC1/HMMR/CHST1/B3GALT6/CD44/B4GALT1/DCN/B4GALT4/SDC3/EXT1/CHST6/CHST2/SDC2	18
BP	GO:0075733	intracellular transport of virus	13/144	57/18670	3.60673e-16	1.16695e-14	8.38917e-15	NUP35/NUP37/RAE1/NDC1/NUP205/NUP85/NUP43/NUP107/NUP155/NUP58/NUP93/NUP210/NUP188	13
BP	GO:0019319	hexose biosynthetic process	15/144	92/18670	3.81501e-16	1.22121e-14	8.77922e-15	INS/ALDOC/ENO1/OGT/GPI/ENO3/GAPDHS/PGK2/PGP/PC/GCK/PPARGC1A/GOT1/PGM1/PPARA	15
BP	GO:0046794	transport of virus	13/144	60/18670	7.4636e-16	2.364e-14	1.69947e-14	NUP35/NUP37/RAE1/NDC1/NUP205/NUP85/NUP43/NUP107/NUP155/NUP58/NUP93/NUP210/NUP188	13
BP	GO:0006022	aminoglycan metabolic process	18/144	170/18670	1.00924e-15	3.16332e-14	2.2741e-14	AGRN/IDUA/CHPF/HS6ST2/VCAN/GPC1/HMMR/CHST1/B3GALT6/CD44/B4GALT1/DCN/B4GALT4/SDC3/EXT1/CHST6/CHST2/SDC2	18
BP	GO:0046364	monosaccharide biosynthetic process	15/144	98/18670	1.02313e-15	3.17381e-14	2.28164e-14	INS/ALDOC/ENO1/OGT/GPI/ENO3/GAPDHS/PGK2/PGP/PC/GCK/PPARGC1A/GOT1/PGM1/PPARA	15
BP	GO:1900034	regulation of cellular response to heat	14/144	79/18670	1.1228e-15	3.44746e-14	2.47837e-14	NUP35/NUP37/FKBP4/RAE1/NDC1/NUP205/NUP85/NUP43/NUP107/NUP155/NUP58/NUP93/NUP210/NUP188	14
BP	GO:0006024	glycosaminoglycan biosynthetic process	15/144	110/18670	6.08859e-15	1.85056e-13	1.33036e-13	AGRN/CHPF/HS6ST2/VCAN/GPC1/CHST1/B3GALT6/B4GALT1/DCN/B4GALT4/SDC3/EXT1/CHST6/CHST2/SDC2	15
BP	GO:0060964	regulation of gene silencing by miRNA	15/144	113/18670	9.19123e-15	2.76564e-13	1.98821e-13	NUP35/NUP37/RAE1/NDC1/NUP205/NUP85/NUP43/NUP107/NUP155/NUP58/NUP93/NUP210/NUP188/NCOR1/EGFR	15
BP	GO:0044766	multi-organism transport	13/144	73/18670	1.14452e-14	3.37633e-13	2.42723e-13	NUP35/NUP37/RAE1/NDC1/NUP205/NUP85/NUP43/NUP107/NUP155/NUP58/NUP93/NUP210/NUP188	13
BP	GO:1902579	multi-organism localization	13/144	73/18670	1.14452e-14	3.37633e-13	2.42723e-13	NUP35/NUP37/RAE1/NDC1/NUP205/NUP85/NUP43/NUP107/NUP155/NUP58/NUP93/NUP210/NUP188	13
BP	GO:0006023	aminoglycan biosynthetic process	15/144	115/18670	1.20138e-14	3.50965e-13	2.52307e-13	AGRN/CHPF/HS6ST2/VCAN/GPC1/CHST1/B3GALT6/B4GALT1/DCN/B4GALT4/SDC3/EXT1/CHST6/CHST2/SDC2	15
BP	GO:0019320	hexose catabolic process	12/144	57/18670	1.46252e-14	4.23146e-13	3.04198e-13	PKM/FUT8/ALDOC/ENO1/GPI/ENO3/GAPDHS/GALK1/PFKFB2/GCK/HK2/PGM1	12
BP	GO:0060147	regulation of posttranscriptional gene silencing	15/144	117/18670	1.56221e-14	4.4346e-13	3.18802e-13	NUP35/NUP37/RAE1/NDC1/NUP205/NUP85/NUP43/NUP107/NUP155/NUP58/NUP93/NUP210/NUP188/NCOR1/EGFR	15
BP	GO:0060966	regulation of gene silencing by RNA	15/144	117/18670	1.56221e-14	4.4346e-13	3.18802e-13	NUP35/NUP37/RAE1/NDC1/NUP205/NUP85/NUP43/NUP107/NUP155/NUP58/NUP93/NUP210/NUP188/NCOR1/EGFR	15
BP	GO:0010675	regulation of cellular carbohydrate metabolic process	16/144	142/18670	1.59345e-14	4.48102e-13	3.22139e-13	INS/GCKR/DDIT4/OGT/MYOG/IGFBP3/PGP/IRS2/IGF1/PFKFB2/HDAC4/INSR/GCK/PPARGC1A/CBFA2T3/PPARA	16
BP	GO:0046365	monosaccharide catabolic process	12/144	67/18670	1.16137e-13	3.2357e-12	2.32613e-12	PKM/FUT8/ALDOC/ENO1/GPI/ENO3/GAPDHS/GALK1/PFKFB2/GCK/HK2/PGM1	12
BP	GO:0034605	cellular response to heat	15/144	137/18670	1.68572e-13	4.65353e-12	3.3454e-12	NUP35/NUP37/FKBP4/RAE1/NDC1/NUP205/NUP85/NUP43/NUP107/NUP155/NUP58/NUP93/NUP210/NUP188/PRKACA	15
BP	GO:0061615	glycolytic process through fructose-6-phosphate	9/144	28/18670	4.57527e-13	1.24027e-11	8.91625e-12	PKM/ALDOC/ENO1/GPI/ENO3/GAPDHS/GALK1/GCK/HK2	9
BP	GO:0061620	glycolytic process through glucose-6-phosphate	9/144	28/18670	4.57527e-13	1.24027e-11	8.91625e-12	PKM/ALDOC/ENO1/GPI/ENO3/GAPDHS/GALK1/GCK/HK2	9
BP	GO:0009408	response to heat	16/144	176/18670	4.71874e-13	1.26774e-11	9.11373e-12	NUP35/NUP37/FKBP4/RAE1/NDC1/NUP205/NUP85/NUP43/NUP107/NUP155/NUP58/NUP93/NUP210/NUP188/IGF1/PRKACA	16
BP	GO:0044282	small molecule catabolic process	23/144	445/18670	5.02778e-13	1.33881e-11	9.62467e-12	SRD5A3/IDUA/PKM/FUT8/ALDOC/ENO1/GPI/GNPDA1/ENO3/HMMR/MIOX/GAPDHS/GALK1/CD44/IRS2/PFKFB2/ENTPD5/GCK/GOT1/HK2/PGM1/PPARA/OGDH	23
BP	GO:0009266	response to temperature stimulus	18/144	243/18670	5.20965e-13	1.37507e-11	9.88534e-12	NUP35/NUP37/FKBP4/RAE1/NDC1/NUP205/NUP85/NUP43/NUP107/NUP155/NUP58/NUP93/ERO1A/NUP210/NUP188/IGF1/PPARGC1A/PRKACA	18
BP	GO:0010677	negative regulation of cellular carbohydrate metabolic process	10/144	42/18670	6.47371e-13	1.69386e-11	1.21771e-11	INS/GCKR/DDIT4/MYOG/PGP/HDAC4/GCK/PPARGC1A/CBFA2T3/PPARA	10
BP	GO:0060968	regulation of gene silencing	15/144	155/18670	1.05047e-12	2.72489e-11	1.95892e-11	NUP35/NUP37/RAE1/NDC1/NUP205/NUP85/NUP43/NUP107/NUP155/NUP58/NUP93/NUP210/NUP188/NCOR1/EGFR	15
BP	GO:0034637	cellular carbohydrate biosynthetic process	12/144	86/18670	2.6143e-12	6.72346e-11	4.83347e-11	INS/PGP/IRS2/IGF1/B4GALT1/AGL/INSR/GCK/EXT1/GOT1/PGM1/UGP2	12
BP	GO:0045912	negative regulation of carbohydrate metabolic process	10/144	48/18670	2.76676e-12	7.05525e-11	5.07199e-11	INS/GCKR/DDIT4/MYOG/PGP/HDAC4/GCK/PPARGC1A/CBFA2T3/PPARA	10
BP	GO:0006406	mRNA export from nucleus	13/144	111/18670	3.10649e-12	7.78953e-11	5.59986e-11	NUP35/NUP37/RAE1/NDC1/NUP205/NUP85/NUP43/NUP107/NUP155/NUP58/NUP93/NUP210/NUP188	13
BP	GO:0071427	mRNA-containing ribonucleoprotein complex export from nucleus	13/144	111/18670	3.10649e-12	7.78953e-11	5.59986e-11	NUP35/NUP37/RAE1/NDC1/NUP205/NUP85/NUP43/NUP107/NUP155/NUP58/NUP93/NUP210/NUP188	13
BP	GO:0018205	peptidyl-lysine modification	21/144	397/18670	3.66972e-12	9.12576e-11	6.56048e-11	NUP35/NUP37/PAXIP1/RAE1/NDC1/NUP205/NUP85/NUP43/NUP107/OGT/NUP155/NUP58/NUP93/NUP210/NUP188/PLOD1/PLOD2/HDAC4/ARNT/PPARGC1A/PRKAA2	21
BP	GO:0006007	glucose catabolic process	9/144	36/18670	5.91885e-12	1.45982e-10	1.04946e-10	PKM/ALDOC/ENO1/GPI/ENO3/GAPDHS/PFKFB2/GCK/HK2	9
BP	GO:0046835	carbohydrate phosphorylation	8/144	24/18670	6.82124e-12	1.66871e-10	1.19963e-10	HKDC1/PFKFB3/GALK1/PFKFB4/PFKFB2/GCK/GNE/HK2	8
BP	GO:0019058	viral life cycle	19/144	328/18670	8.82724e-12	2.14203e-10	1.5399e-10	NUP35/NUP37/CDK1/RAE1/NDC1/PPIA/NUP205/NUP85/NUP43/NUP107/NUP155/CLDN9/NUP58/NUP93/NUP210/NUP188/ISG20/PC/EGFR	19
BP	GO:0071426	ribonucleoprotein complex export from nucleus	13/144	127/18670	1.77167e-11	4.26476e-10	3.06592e-10	NUP35/NUP37/RAE1/NDC1/NUP205/NUP85/NUP43/NUP107/NUP155/NUP58/NUP93/NUP210/NUP188	13
BP	GO:0071166	ribonucleoprotein complex localization	13/144	128/18670	1.95906e-11	4.67843e-10	3.3633e-10	NUP35/NUP37/RAE1/NDC1/NUP205/NUP85/NUP43/NUP107/NUP155/NUP58/NUP93/NUP210/NUP188	13
BP	GO:0006735	NADH regeneration	8/144	27/18670	2.01931e-11	4.71016e-10	3.38612e-10	PKM/ALDOC/ENO1/GPI/ENO3/GAPDHS/GCK/HK2	8
BP	GO:0061621	canonical glycolysis	8/144	27/18670	2.01931e-11	4.71016e-10	3.38612e-10	PKM/ALDOC/ENO1/GPI/ENO3/GAPDHS/GCK/HK2	8
BP	GO:0061718	glucose catabolic process to pyruvate	8/144	27/18670	2.01931e-11	4.71016e-10	3.38612e-10	PKM/ALDOC/ENO1/GPI/ENO3/GAPDHS/GCK/HK2	8
BP	GO:0006405	RNA export from nucleus	13/144	135/18670	3.86721e-11	8.9511e-10	6.43491e-10	NUP35/NUP37/RAE1/NDC1/NUP205/NUP85/NUP43/NUP107/NUP155/NUP58/NUP93/NUP210/NUP188	13
BP	GO:1903510	mucopolysaccharide metabolic process	12/144	112/18670	6.36826e-11	1.46276e-09	1.05157e-09	IDUA/CHPF/VCAN/HMMR/CHST1/B3GALT6/CD44/B4GALT1/DCN/B4GALT4/CHST6/CHST2	12
BP	GO:0006044	N-acetylglucosamine metabolic process	7/144	19/18670	6.53825e-11	1.49042e-09	1.07146e-09	CHST4/NANP/GNPDA1/CHST1/GNE/CHST6/CHST2	7
BP	GO:0010906	regulation of glucose metabolic process	12/144	117/18670	1.06936e-10	2.41933e-09	1.73925e-09	INS/GCKR/OGT/IGFBP3/PGP/IRS2/IGF1/PFKFB2/INSR/GCK/PPARGC1A/PPARA	12
BP	GO:0006611	protein export from nucleus	14/144	179/18670	1.10758e-10	2.48709e-09	1.78796e-09	NUP35/NUP37/RAE1/NDC1/NUP205/NUP85/NUP43/NUP107/NUP155/NUP58/NUP93/NUP210/NUP188/PRKACA	14
BP	GO:0051028	mRNA transport	13/144	152/18670	1.73163e-10	3.85962e-09	2.77466e-09	NUP35/NUP37/RAE1/NDC1/NUP205/NUP85/NUP43/NUP107/NUP155/NUP58/NUP93/NUP210/NUP188	13
BP	GO:0045820	negative regulation of glycolytic process	6/144	13/18670	3.1119e-10	6.88509e-09	4.94966e-09	DDIT4/MYOG/HDAC4/PPARGC1A/CBFA2T3/PPARA	6
BP	GO:0051168	nuclear export	14/144	194/18670	3.22816e-10	7.09018e-09	5.0971e-09	NUP35/NUP37/RAE1/NDC1/NUP205/NUP85/NUP43/NUP107/NUP155/NUP58/NUP93/NUP210/NUP188/PRKACA	14
BP	GO:0001666	response to hypoxia	18/144	359/18670	3.41478e-10	7.44571e-09	5.35269e-09	STC2/DDIT4/PKM/ENO1/STC1/ERO1A/VEGFA/PLOD1/PLOD2/ANG/ARNT/CITED2/EGLN3/FAM162A/PPARGC1A/CBFA2T3/HK2/PPARA	18
BP	GO:0031331	positive regulation of cellular catabolic process	18/144	361/18670	3.73436e-10	8.08396e-09	5.81152e-09	INS/PFKFB3/AURKA/MLXIPL/GAPDHS/PFKFB4/IRS2/IGF1/PFKFB2/P2RX7/ARNT/ENTPD5/DCN/INSR/CBFA2T3/HK2/PRKAA2/PPARA	18
BP	GO:0006040	amino sugar metabolic process	8/144	38/18670	4.14147e-10	8.83807e-09	6.35366e-09	CHST4/NANP/GNPDA1/CHST1/GNE/CHST6/CHST2/SLC35A3	8
BP	GO:0009225	nucleotide-sugar metabolic process	8/144	38/18670	4.14147e-10	8.83807e-09	6.35366e-09	FUT8/GNPDA1/TSTA3/GMPPB/GNE/MPI/UGP2/SLC35A3	8
BP	GO:1901071	glucosamine-containing compound metabolic process	7/144	24/18670	4.3487e-10	9.21495e-09	6.62459e-09	CHST4/NANP/GNPDA1/CHST1/GNE/CHST6/CHST2	7
BP	GO:0036293	response to decreased oxygen levels	18/144	370/18670	5.54599e-10	1.16698e-08	8.3894e-09	STC2/DDIT4/PKM/ENO1/STC1/ERO1A/VEGFA/PLOD1/PLOD2/ANG/ARNT/CITED2/EGLN3/FAM162A/PPARGC1A/CBFA2T3/HK2/PPARA	18
BP	GO:0015931	nucleobase-containing compound transport	15/144	241/18670	5.80001e-10	1.21196e-08	8.71274e-09	NUP35/NUP37/RAE1/NDC1/NUP205/NUP85/NUP43/NUP107/NUP155/NUP58/NUP93/NUP210/NUP188/P2RX7/SLC35A3	15
BP	GO:0006734	NADH metabolic process	8/144	40/18670	6.42878e-10	1.33408e-08	9.59067e-09	PKM/ALDOC/ENO1/GPI/ENO3/GAPDHS/GCK/HK2	8
BP	GO:0009896	positive regulation of catabolic process	19/144	423/18670	6.77095e-10	1.39547e-08	1.00319e-08	INS/PFKFB3/SOX9/AURKA/MLXIPL/GAPDHS/PFKFB4/IRS2/IGF1/PFKFB2/P2RX7/ARNT/ENTPD5/DCN/INSR/CBFA2T3/HK2/PRKAA2/PPARA	19
BP	GO:1903579	negative regulation of ATP metabolic process	7/144	26/18670	8.15934e-10	1.67017e-08	1.20068e-08	DDIT4/MLXIPL/MYOG/HDAC4/PPARGC1A/CBFA2T3/PPARA	7
BP	GO:0030812	negative regulation of nucleotide catabolic process	6/144	15/18670	8.96178e-10	1.8098e-08	1.30106e-08	DDIT4/MYOG/HDAC4/PPARGC1A/CBFA2T3/PPARA	6
BP	GO:0051198	negative regulation of coenzyme metabolic process	6/144	15/18670	8.96178e-10	1.8098e-08	1.30106e-08	DDIT4/MYOG/HDAC4/PPARGC1A/CBFA2T3/PPARA	6
BP	GO:0006027	glycosaminoglycan catabolic process	9/144	61/18670	9.2613e-10	1.85782e-08	1.33558e-08	AGRN/IDUA/VCAN/GPC1/HMMR/CD44/DCN/SDC3/SDC2	9
BP	GO:0019083	viral transcription	13/144	177/18670	1.14855e-09	2.28873e-08	1.64536e-08	NUP35/NUP37/RAE1/NDC1/NUP205/NUP85/NUP43/NUP107/NUP155/NUP58/NUP93/NUP210/NUP188	13
BP	GO:0005976	polysaccharide metabolic process	11/144	114/18670	1.27608e-09	2.52613e-08	1.81603e-08	INS/CHST1/IRS2/PRKAG2/IGF1/AGL/INSR/GCK/EXT1/PGM1/UGP2	11
BP	GO:2001170	negative regulation of ATP biosynthetic process	6/144	16/18670	1.4248e-09	2.80211e-08	2.01443e-08	DDIT4/MYOG/HDAC4/PPARGC1A/CBFA2T3/PPARA	6
BP	GO:1900543	negative regulation of purine nucleotide metabolic process	7/144	28/18670	1.44989e-09	2.83294e-08	2.03659e-08	DDIT4/MLXIPL/MYOG/HDAC4/PPARGC1A/CBFA2T3/PPARA	7
BP	GO:0070482	response to oxygen levels	18/144	394/18670	1.50971e-09	2.93079e-08	2.10693e-08	STC2/DDIT4/PKM/ENO1/STC1/ERO1A/VEGFA/PLOD1/PLOD2/ANG/ARNT/CITED2/EGLN3/FAM162A/PPARGC1A/CBFA2T3/HK2/PPARA	18
BP	GO:0006026	aminoglycan catabolic process	9/144	65/18670	1.66319e-09	3.20803e-08	2.30624e-08	AGRN/IDUA/VCAN/GPC1/HMMR/CD44/DCN/SDC3/SDC2	9
BP	GO:0045980	negative regulation of nucleotide metabolic process	7/144	29/18670	1.89896e-09	3.63948e-08	2.61641e-08	DDIT4/MLXIPL/MYOG/HDAC4/PPARGC1A/CBFA2T3/PPARA	7
BP	GO:0005978	glycogen biosynthetic process	8/144	46/18670	2.09793e-09	3.97023e-08	2.85418e-08	INS/IRS2/IGF1/AGL/INSR/GCK/PGM1/UGP2	8
BP	GO:0009250	glucan biosynthetic process	8/144	46/18670	2.09793e-09	3.97023e-08	2.85418e-08	INS/IRS2/IGF1/AGL/INSR/GCK/PGM1/UGP2	8
BP	GO:0019080	viral gene expression	13/144	191/18670	2.91585e-09	5.48362e-08	3.94215e-08	NUP35/NUP37/RAE1/NDC1/NUP205/NUP85/NUP43/NUP107/NUP155/NUP58/NUP93/NUP210/NUP188	13
BP	GO:0030809	negative regulation of nucleotide biosynthetic process	6/144	18/18670	3.26126e-09	6.05749e-08	4.3547e-08	DDIT4/MYOG/HDAC4/PPARGC1A/CBFA2T3/PPARA	6
BP	GO:1900372	negative regulation of purine nucleotide biosynthetic process	6/144	18/18670	3.26126e-09	6.05749e-08	4.3547e-08	DDIT4/MYOG/HDAC4/PPARGC1A/CBFA2T3/PPARA	6
BP	GO:0050657	nucleic acid transport	13/144	193/18670	3.30981e-09	6.07269e-08	4.36563e-08	NUP35/NUP37/RAE1/NDC1/NUP205/NUP85/NUP43/NUP107/NUP155/NUP58/NUP93/NUP210/NUP188	13
BP	GO:0050658	RNA transport	13/144	193/18670	3.30981e-09	6.07269e-08	4.36563e-08	NUP35/NUP37/RAE1/NDC1/NUP205/NUP85/NUP43/NUP107/NUP155/NUP58/NUP93/NUP210/NUP188	13
BP	GO:0033692	cellular polysaccharide biosynthetic process	9/144	71/18670	3.72602e-09	6.79491e-08	4.88483e-08	INS/IRS2/IGF1/AGL/INSR/GCK/EXT1/PGM1/UGP2	9
BP	GO:0009100	glycoprotein metabolic process	18/144	419/18670	3.97775e-09	7.19211e-08	5.17038e-08	CHST4/SRD5A3/IDUA/FUT8/CHPF/HS6ST2/VCAN/OGT/GPC1/B3GALT6/IGF1/B4GALT1/ENTPD5/DCN/B4GALT4/EXT1/GAL3ST1/MPI	18
BP	GO:0051236	establishment of RNA localization	13/144	196/18670	3.99163e-09	7.19211e-08	5.17038e-08	NUP35/NUP37/RAE1/NDC1/NUP205/NUP85/NUP43/NUP107/NUP155/NUP58/NUP93/NUP210/NUP188	13
BP	GO:0005977	glycogen metabolic process	9/144	74/18670	5.42249e-09	9.71206e-08	6.98196e-08	INS/IRS2/PRKAG2/IGF1/AGL/INSR/GCK/PGM1/UGP2	9
BP	GO:0006073	cellular glucan metabolic process	9/144	75/18670	6.12185e-09	1.08357e-07	7.78972e-08	INS/IRS2/PRKAG2/IGF1/AGL/INSR/GCK/PGM1/UGP2	9
BP	GO:0044042	glucan metabolic process	9/144	75/18670	6.12185e-09	1.08357e-07	7.78972e-08	INS/IRS2/PRKAG2/IGF1/AGL/INSR/GCK/PGM1/UGP2	9
BP	GO:0044264	cellular polysaccharide metabolic process	10/144	103/18670	6.96193e-09	1.22506e-07	8.80687e-08	INS/IRS2/PRKAG2/IGF1/AGL/INSR/GCK/EXT1/PGM1/UGP2	10
BP	GO:0000271	polysaccharide biosynthetic process	9/144	78/18670	8.71665e-09	1.52491e-07	1.09625e-07	INS/IRS2/IGF1/AGL/INSR/GCK/EXT1/PGM1/UGP2	9
BP	GO:0062014	negative regulation of small molecule metabolic process	10/144	107/18670	1.01013e-08	1.75693e-07	1.26305e-07	INS/DDIT4/MLXIPL/MYOG/PGP/HDAC4/GCK/PPARGC1A/CBFA2T3/PPARA	10
BP	GO:0009435	NAD biosynthetic process	8/144	56/18670	1.07033e-08	1.85094e-07	1.33063e-07	PKM/ALDOC/ENO1/GPI/ENO3/GAPDHS/GCK/HK2	8
BP	GO:0009101	glycoprotein biosynthetic process	16/144	348/18670	1.19403e-08	2.05305e-07	1.47593e-07	CHST4/SRD5A3/FUT8/CHPF/HS6ST2/VCAN/OGT/B3GALT6/IGF1/B4GALT1/ENTPD5/DCN/B4GALT4/EXT1/GAL3ST1/MPI	16
BP	GO:0051195	negative regulation of cofactor metabolic process	6/144	22/18670	1.2779e-08	2.18477e-07	1.57062e-07	DDIT4/MYOG/HDAC4/PPARGC1A/CBFA2T3/PPARA	6
BP	GO:0006112	energy reserve metabolic process	9/144	87/18670	2.31186e-08	3.93017e-07	2.82538e-07	INS/IRS2/PRKAG2/IGF1/AGL/INSR/GCK/PGM1/UGP2	9
BP	GO:0010676	positive regulation of cellular carbohydrate metabolic process	8/144	62/18670	2.45038e-08	4.14225e-07	2.97785e-07	INS/IRS2/IGF1/PFKFB2/INSR/GCK/PPARGC1A/PPARA	8
BP	GO:0006403	RNA localization	13/144	230/18670	2.71671e-08	4.56681e-07	3.28306e-07	NUP35/NUP37/RAE1/NDC1/NUP205/NUP85/NUP43/NUP107/NUP155/NUP58/NUP93/NUP210/NUP188	13
BP	GO:0010907	positive regulation of glucose metabolic process	7/144	42/18670	3.01903e-08	5.04681e-07	3.62813e-07	INS/IRS2/IGF1/INSR/GCK/PPARGC1A/PPARA	7
BP	GO:0006012	galactose metabolic process	5/144	13/18670	3.11749e-08	5.18261e-07	3.72576e-07	CHST1/GALK1/B4GALT1/PPARGC1A/PGM1	5
BP	GO:0031503	protein-containing complex localization	14/144	281/18670	3.79972e-08	6.28206e-07	4.51615e-07	NUP35/NUP37/FKBP4/RAE1/NDC1/NUP205/NUP85/NUP43/NUP107/NUP155/NUP58/NUP93/NUP210/NUP188	14
BP	GO:0015980	energy derivation by oxidation of organic compounds	14/144	285/18670	4.53254e-08	7.45269e-07	5.35771e-07	CDK1/INS/IRS2/PRKAG2/IGF1/ME2/AGL/INSR/GCK/PPARGC1A/CBFA2T3/PGM1/UGP2/OGDH	14
BP	GO:0006029	proteoglycan metabolic process	9/144	94/18670	4.58037e-08	7.49039e-07	5.38481e-07	IDUA/CHPF/HS6ST2/VCAN/GPC1/B3GALT6/IGF1/DCN/EXT1	9
BP	GO:0006999	nuclear pore organization	5/144	14/18670	4.81937e-08	7.83863e-07	5.63516e-07	NUP35/NDC1/NUP205/NUP107/NUP93	5
BP	GO:0043255	regulation of carbohydrate biosynthetic process	9/144	97/18670	6.03491e-08	9.76293e-07	7.01853e-07	INS/OGT/PGP/IRS2/IGF1/INSR/GCK/PPARGC1A/PPARA	9
BP	GO:0006913	nucleocytoplasmic transport	15/144	343/18670	6.77645e-08	1.09039e-06	7.83878e-07	NUP35/NUP37/RAE1/NDC1/NUP205/GCKR/NUP85/NUP43/NUP107/NUP155/NUP58/NUP93/NUP210/NUP188/PRKACA	15
BP	GO:0051169	nuclear transport	15/144	346/18670	7.5925e-08	1.2152e-06	8.73605e-07	NUP35/NUP37/RAE1/NDC1/NUP205/GCKR/NUP85/NUP43/NUP107/NUP155/NUP58/NUP93/NUP210/NUP188/PRKACA	15
BP	GO:0019674	NAD metabolic process	8/144	76/18670	1.24795e-07	1.98681e-06	1.42831e-06	PKM/ALDOC/ENO1/GPI/ENO3/GAPDHS/GCK/HK2	8
BP	GO:0045725	positive regulation of glycogen biosynthetic process	5/144	17/18670	1.4621e-07	2.3155e-06	1.6646e-06	INS/IRS2/IGF1/INSR/GCK	5
BP	GO:0070875	positive regulation of glycogen metabolic process	5/144	18/18670	2.0119e-07	3.16953e-06	2.27856e-06	INS/IRS2/IGF1/INSR/GCK	5
BP	GO:0046931	pore complex assembly	5/144	20/18670	3.59561e-07	5.635e-06	4.05098e-06	NDC1/NUP205/NUP107/NUP93/P2RX7	5
BP	GO:0014066	regulation of phosphatidylinositol 3-kinase signaling	9/144	124/18670	5.02492e-07	7.83419e-06	5.63197e-06	INS/SOX9/IER3/IRS2/IGF1/ENTPD5/DCN/INSR/EGFR	9
BP	GO:0009226	nucleotide-sugar biosynthetic process	5/144	23/18670	7.65964e-07	1.18803e-05	8.54072e-06	GNPDA1/TSTA3/GMPPB/MPI/UGP2	5
BP	GO:0043062	extracellular structure organization	15/144	422/18670	9.59361e-07	1.48037e-05	1.06423e-05	TGFBI/AGRN/SOX9/VCAN/COL5A1/ERO1A/PLOD1/CD44/P4HA1/PLOD2/B4GALT1/PRKACB/DCN/ELF3/PRKACA	15
BP	GO:0030166	proteoglycan biosynthetic process	7/144	69/18670	1.01504e-06	1.5583e-05	1.12025e-05	CHPF/HS6ST2/VCAN/B3GALT6/IGF1/DCN/EXT1	7
BP	GO:0006790	sulfur compound metabolic process	14/144	372/18670	1.15253e-06	1.76039e-05	1.26554e-05	CHST4/IDUA/CHPF/VCAN/CHST1/B3GALT6/PC/B4GALT1/BPNT1/DCN/B4GALT4/CHST6/CHST2/OGDH	14
BP	GO:0048015	phosphatidylinositol-mediated signaling	10/144	181/18670	1.43056e-06	2.17402e-05	1.5629e-05	INS/SOX9/OGT/IER3/IRS2/IGF1/ENTPD5/DCN/INSR/EGFR	10
BP	GO:0048017	inositol lipid-mediated signaling	10/144	184/18670	1.66038e-06	2.51059e-05	1.80485e-05	INS/SOX9/OGT/IER3/IRS2/IGF1/ENTPD5/DCN/INSR/EGFR	10
BP	GO:0006111	regulation of gluconeogenesis	6/144	48/18670	1.78227e-06	2.68142e-05	1.92766e-05	INS/OGT/PGP/GCK/PPARGC1A/PPARA	6
BP	GO:0032147	activation of protein kinase activity	13/144	333/18670	1.89158e-06	2.83173e-05	2.03572e-05	CDK1/INS/VEGFA/PRKAG2/ADORA2B/ANG/IGF1/TGFA/P2RX7/PRKACB/INSR/EGFR/PRKACA	13
BP	GO:2000241	regulation of reproductive process	9/144	146/18670	1.98207e-06	2.95249e-05	2.12254e-05	SOX9/AURKA/IGF1/HDAC4/CACNA1H/B4GALT1/PRKACB/CITED2/INSR	9
BP	GO:0018146	keratan sulfate biosynthetic process	5/144	28/18670	2.1688e-06	3.21474e-05	2.31106e-05	CHST1/B4GALT1/B4GALT4/CHST6/CHST2	5
BP	GO:0014065	phosphatidylinositol 3-kinase signaling	9/144	148/18670	2.21895e-06	3.27295e-05	2.35291e-05	INS/SOX9/IER3/IRS2/IGF1/ENTPD5/DCN/INSR/EGFR	9
BP	GO:1901136	carbohydrate derivative catabolic process	10/144	192/18670	2.43732e-06	3.5775e-05	2.57185e-05	AGRN/IDUA/VCAN/GPC1/GNPDA1/HMMR/CD44/DCN/SDC3/SDC2	10
BP	GO:0005979	regulation of glycogen biosynthetic process	5/144	29/18670	2.60442e-06	3.78585e-05	2.72163e-05	INS/IRS2/IGF1/INSR/GCK	5
BP	GO:0010962	regulation of glucan biosynthetic process	5/144	29/18670	2.60442e-06	3.78585e-05	2.72163e-05	INS/IRS2/IGF1/INSR/GCK	5
BP	GO:0042593	glucose homeostasis	11/144	241/18670	2.73084e-06	3.95052e-05	2.84001e-05	HKDC1/INS/GCKR/MLXIPL/IRS2/INSR/GCK/PPARGC1A/PRKACA/HK2/PRKAA2	11
BP	GO:0033500	carbohydrate homeostasis	11/144	242/18670	2.84219e-06	4.09194e-05	2.94168e-05	HKDC1/INS/GCKR/MLXIPL/IRS2/INSR/GCK/PPARGC1A/PRKACA/HK2/PRKAA2	11
BP	GO:0006000	fructose metabolic process	4/144	15/18670	4.33691e-06	6.18472e-05	4.44617e-05	PFKFB3/ALDOC/PFKFB4/PFKFB2	4
BP	GO:0055089	fatty acid homeostasis	4/144	15/18670	4.33691e-06	6.18472e-05	4.44617e-05	INS/MLXIPL/GOT1/PRKAA2	4
BP	GO:0071456	cellular response to hypoxia	10/144	207/18670	4.77145e-06	6.7723e-05	4.86858e-05	STC2/ENO1/STC1/ERO1A/VEGFA/ARNT/CITED2/EGLN3/FAM162A/PPARGC1A	10
BP	GO:0042339	keratan sulfate metabolic process	5/144	33/18670	5.07746e-06	7.1728e-05	5.1565e-05	CHST1/B4GALT1/B4GALT4/CHST6/CHST2	5
BP	GO:0006486	protein glycosylation	11/144	258/18670	5.25145e-06	7.34958e-05	5.28358e-05	CHST4/SRD5A3/FUT8/OGT/B3GALT6/B4GALT1/ENTPD5/B4GALT4/EXT1/GAL3ST1/MPI	11
BP	GO:0043413	macromolecule glycosylation	11/144	258/18670	5.25145e-06	7.34958e-05	5.28358e-05	CHST4/SRD5A3/FUT8/OGT/B3GALT6/B4GALT1/ENTPD5/B4GALT4/EXT1/GAL3ST1/MPI	11
BP	GO:0090257	regulation of muscle system process	11/144	259/18670	5.44857e-06	7.59015e-05	5.45653e-05	ENO1/STC1/MYOG/ADORA2B/IGF1/HDAC4/PKP2/PPARGC1A/PRKACA/PPARA/DSC2	11
BP	GO:0030198	extracellular matrix organization	13/144	368/18670	5.639e-06	7.81924e-05	5.62122e-05	TGFBI/AGRN/SOX9/VCAN/COL5A1/ERO1A/PLOD1/CD44/P4HA1/PLOD2/B4GALT1/DCN/ELF3	13
BP	GO:0034504	protein localization to nucleus	11/144	262/18670	6.07925e-06	8.39104e-05	6.03228e-05	NUP35/CDK1/INS/SOX9/GCKR/NUP85/NUP107/NUP155/NUP58/NUP93/NUP188	11
BP	GO:0048608	reproductive structure development	14/144	431/18670	6.35946e-06	8.73772e-05	6.28151e-05	BIK/FKBP4/STC2/SOX9/NUP107/STC1/NSDHL/VEGFA/ANG/ARNT/CITED2/DCN/INSR/EGFR	14
BP	GO:0046324	regulation of glucose import	6/144	60/18670	6.73919e-06	9.21737e-05	6.62633e-05	INS/IRS2/PRKAG2/IGF1/INSR/HK2	6
BP	GO:0070873	regulation of glycogen metabolic process	5/144	35/18670	6.85943e-06	9.32731e-05	6.70537e-05	INS/IRS2/IGF1/INSR/GCK	5
BP	GO:0061458	reproductive system development	14/144	434/18670	6.88157e-06	9.32731e-05	6.70537e-05	BIK/FKBP4/STC2/SOX9/NUP107/STC1/NSDHL/VEGFA/ANG/ARNT/CITED2/DCN/INSR/EGFR	14
BP	GO:0036294	cellular response to decreased oxygen levels	10/144	217/18670	7.2386e-06	9.76725e-05	7.02163e-05	STC2/ENO1/STC1/ERO1A/VEGFA/ARNT/CITED2/EGLN3/FAM162A/PPARGC1A	10
BP	GO:0050714	positive regulation of protein secretion	11/144	268/18670	7.53438e-06	0.00010121	7.27591e-05	INS/MIF/PPIA/GPI/IRS2/ANG/IGF1/PFKFB2/P2RX7/GCK/EGFR	11
BP	GO:0006997	nucleus organization	8/144	130/18670	7.57752e-06	0.000101337	7.28506e-05	NUP35/CDK1/NDC1/NUP205/NUP107/NUP155/SPAG4/NUP93	8
BP	GO:0018209	peptidyl-serine modification	12/144	322/18670	7.66404e-06	0.00010204	7.33563e-05	CDK1/MIF/DDIT4/AURKA/MLXIPL/VEGFA/CD44/PRKACB/DCN/EGFR/PRKACA/PRKAA2	12
BP	GO:0070085	glycosylation	11/144	269/18670	7.80433e-06	0.00010345	7.437e-05	CHST4/SRD5A3/FUT8/OGT/B3GALT6/B4GALT1/ENTPD5/B4GALT4/EXT1/GAL3ST1/MPI	11
BP	GO:0032885	regulation of polysaccharide biosynthetic process	5/144	37/18670	9.09695e-06	0.000120056	8.63076e-05	INS/IRS2/IGF1/INSR/GCK	5
BP	GO:0019217	regulation of fatty acid metabolic process	7/144	96/18670	9.43047e-06	0.000123914	8.90812e-05	INS/MLXIPL/IRS2/PRKAG2/PPARGC1A/PRKAA2/PPARA	7
BP	GO:0015908	fatty acid transport	7/144	97/18670	1.0099e-05	0.000132122	9.49817e-05	MIF/IRS2/PRKAG2/NCOR1/P2RX7/PRKAA2/PPARA	7
BP	GO:0030204	chondroitin sulfate metabolic process	5/144	39/18670	1.18677e-05	0.000154589	0.000111133	IDUA/CHPF/VCAN/B3GALT6/DCN	5
BP	GO:0009743	response to carbohydrate	10/144	230/18670	1.2042e-05	0.000156182	0.000112279	GCKR/ME1/MLXIPL/IRS2/PFKFB2/GCK/PPARGC1A/PRKACA/GOT1/PRKAA2	10
BP	GO:1903532	positive regulation of secretion by cell	13/144	399/18670	1.33891e-05	0.00017291	0.000124304	INS/MIF/PPIA/GPI/IRS2/ADORA2B/ANG/IGF1/PFKFB2/CACNA1H/P2RX7/GCK/EGFR	13
BP	GO:0071453	cellular response to oxygen levels	10/144	234/18670	1.3987e-05	0.000179347	0.000128932	STC2/ENO1/STC1/ERO1A/VEGFA/ARNT/CITED2/EGLN3/FAM162A/PPARGC1A	10
BP	GO:0046323	glucose import	6/144	68/18670	1.40068e-05	0.000179347	0.000128932	INS/IRS2/PRKAG2/IGF1/INSR/HK2	6
BP	GO:0002793	positive regulation of peptide secretion	11/144	288/18670	1.48029e-05	0.000188737	0.000135683	INS/MIF/PPIA/GPI/IRS2/ANG/IGF1/PFKFB2/P2RX7/GCK/EGFR	11
BP	GO:0003012	muscle system process	14/144	465/18670	1.4961e-05	0.000189948	0.000136553	ENO1/NUP155/STC1/MYOG/HOMER1/ADORA2B/IGF1/HDAC4/CACNA1H/PKP2/PPARGC1A/PRKACA/PPARA/DSC2	14
BP	GO:0006606	protein import into nucleus	8/144	143/18670	1.52404e-05	0.000191923	0.000137973	NUP35/GCKR/NUP85/NUP107/NUP155/NUP58/NUP93/NUP188	8
BP	GO:2000243	positive regulation of reproductive process	6/144	69/18670	1.52441e-05	0.000191923	0.000137973	SOX9/AURKA/HDAC4/CACNA1H/CITED2/INSR	6
BP	GO:0044272	sulfur compound biosynthetic process	9/144	192/18670	1.83751e-05	0.000230377	0.000165617	CHPF/VCAN/CHST1/B3GALT6/B4GALT1/DCN/B4GALT4/CHST6/CHST2	9
BP	GO:0032881	regulation of polysaccharide metabolic process	5/144	43/18670	1.93559e-05	0.000241667	0.000173733	INS/IRS2/IGF1/INSR/GCK	5
BP	GO:0018105	peptidyl-serine phosphorylation	11/144	299/18670	2.09536e-05	0.000260535	0.000187298	CDK1/MIF/DDIT4/AURKA/MLXIPL/VEGFA/CD44/PRKACB/EGFR/PRKACA/PRKAA2	11
BP	GO:0050654	chondroitin sulfate proteoglycan metabolic process	5/144	44/18670	2.17026e-05	0.000268737	0.000193194	IDUA/CHPF/VCAN/B3GALT6/DCN	5
BP	GO:0001678	cellular glucose homeostasis	8/144	152/18670	2.37144e-05	0.000292445	0.000210237	HKDC1/MLXIPL/IRS2/GCK/PPARGC1A/PRKACA/HK2/PRKAA2	8
BP	GO:0051047	positive regulation of secretion	13/144	428/18670	2.79292e-05	0.000343016	0.000246593	INS/MIF/PPIA/GPI/IRS2/ADORA2B/ANG/IGF1/PFKFB2/CACNA1H/P2RX7/GCK/EGFR	13
BP	GO:0010827	regulation of glucose transmembrane transport	6/144	78/18670	3.08568e-05	0.000377432	0.000271334	INS/IRS2/PRKAG2/IGF1/INSR/HK2	6
BP	GO:0018126	protein hydroxylation	4/144	24/18670	3.19866e-05	0.000389667	0.00028013	PLOD1/P4HA1/PLOD2/EGLN3	4
BP	GO:0051156	glucose 6-phosphate metabolic process	4/144	25/18670	3.78518e-05	0.000459258	0.000330159	HKDC1/GPI/GCK/HK2	4
BP	GO:0051170	import into nucleus	8/144	163/18670	3.91278e-05	0.000472834	0.000339918	NUP35/GCKR/NUP85/NUP107/NUP155/NUP58/NUP93/NUP188	8
BP	GO:0030206	chondroitin sulfate biosynthetic process	4/144	26/18670	4.44667e-05	0.000535201	0.000384754	CHPF/VCAN/B3GALT6/DCN	4
BP	GO:0045787	positive regulation of cell cycle	12/144	389/18670	4.94775e-05	0.000593138	0.000426405	CDK1/INS/MIF/AURKA/MLXIPL/MYOG/IGF1/TGFA/CITED2/INSR/EGFR/PRKACA	12
BP	GO:0010749	regulation of nitric oxide mediated signal transduction	3/144	10/18670	5.18264e-05	0.000614692	0.0004419	INS/VEGFA/EGFR	3
BP	GO:1903862	positive regulation of oxidative phosphorylation	3/144	10/18670	5.18264e-05	0.000614692	0.0004419	CDK1/MYOG/PGK2	3
BP	GO:2000191	regulation of fatty acid transport	4/144	27/18670	5.18883e-05	0.000614692	0.0004419	MIF/IRS2/NCOR1/P2RX7	4
BP	GO:0045840	positive regulation of mitotic nuclear division	5/144	53/18670	5.42406e-05	0.00064004	0.000460122	INS/AURKA/IGF1/TGFA/INSR	5
BP	GO:0014068	positive regulation of phosphatidylinositol 3-kinase signaling	6/144	87/18670	5.73153e-05	0.000673678	0.000484305	INS/SOX9/IRS2/IGF1/DCN/INSR	6
BP	GO:0042326	negative regulation of phosphorylation	13/144	468/18670	6.97153e-05	0.000816239	0.000586791	GCKR/DDIT4/MLXIPL/MYOG/IGFBP3/IRS2/PRKAG2/NCOR1/HDAC4/P2RX7/PPARGC1A/CBFA2T3/PPARA	13
BP	GO:0006054	N-acetylneuraminate metabolic process	3/144	11/18670	7.08586e-05	0.000823218	0.000591808	NANP/GNPDA1/GNE	3
BP	GO:0014870	response to muscle inactivity	3/144	11/18670	7.08586e-05	0.000823218	0.000591808	PKM/MYOG/HDAC4	3
BP	GO:0060537	muscle tissue development	12/144	408/18670	7.80418e-05	0.000903184	0.000649296	CDK1/SOX9/GPC1/MYOG/VEGFA/HOMER1/IGF1/HDAC4/DCN/PKP2/PPARGC1A/PPARA	12
BP	GO:0046320	regulation of fatty acid oxidation	4/144	30/18670	7.9583e-05	0.000917492	0.000659581	IRS2/PRKAG2/PPARGC1A/PPARA	4
BP	GO:0002082	regulation of oxidative phosphorylation	4/144	31/18670	9.08279e-05	0.00103917	0.000747053	CDK1/MLXIPL/MYOG/PGK2	4
BP	GO:0050650	chondroitin sulfate proteoglycan biosynthetic process	4/144	31/18670	9.08279e-05	0.00103917	0.000747053	CHPF/VCAN/B3GALT6/DCN	4
BP	GO:0051222	positive regulation of protein transport	12/144	418/18670	9.81207e-05	0.00111835	0.000803979	INS/MIF/PPIA/GPI/IRS2/ANG/IGF1/PFKFB2/P2RX7/GCK/EGFR/PRKACA	12
BP	GO:0048871	multicellular organismal homeostasis	13/144	485/18670	9.97444e-05	0.00113257	0.000814199	SOX9/OGT/MLXIPL/MET/STMN1/VEGFA/HOMER1/P2RX7/PRKACB/EGFR/PPARGC1A/PRKACA/PRKAA2	13
BP	GO:0034599	cellular response to oxidative stress	10/144	302/18670	0.000120282	0.00135839	0.000976541	CDK1/INS/FUT8/ANKZF1/MET/ERO1A/ARNT/EGFR/PPARGC1A/PRKAA2	10
BP	GO:0030205	dermatan sulfate metabolic process	3/144	13/18670	0.000121438	0.00135839	0.000976541	IDUA/VCAN/DCN	3
BP	GO:0046349	amino sugar biosynthetic process	3/144	13/18670	0.000121438	0.00135839	0.000976541	NANP/GNPDA1/GNE	3
BP	GO:1902894	negative regulation of pri-miRNA transcription by RNA polymerase II	3/144	13/18670	0.000121438	0.00135839	0.000976541	SOX9/HDAC4/PPARA	3
BP	GO:0010038	response to metal ion	11/144	364/18670	0.000123263	0.00137369	0.000987542	CDK1/MYOG/HOMER1/CACNA1H/CYB5A/P2RX7/PPP2CB/EGFR/PPARGC1A/GOT1/PRKAA2	11
BP	GO:0032148	activation of protein kinase B activity	4/144	34/18670	0.000131489	0.00145997	0.00104956	INS/ANG/IGF1/INSR	4
BP	GO:0048732	gland development	12/144	434/18670	0.000139491	0.00154312	0.00110934	FKBP4/SOX9/PKM/AURKA/MET/VEGFA/IRS2/CITED2/ELF3/INSR/EGFR/HK2	12
BP	GO:0009895	negative regulation of catabolic process	10/144	308/18670	0.000141233	0.00155667	0.00111908	INS/DDIT4/OGT/MYOG/MET/HDAC4/EGFR/PPARGC1A/CBFA2T3/PPARA	10
BP	GO:0014904	myotube cell development	4/144	35/18670	0.000147571	0.00162058	0.00116503	MYOG/HOMER1/IGF1/HDAC4	4
BP	GO:0008643	carbohydrate transport	7/144	148/18670	0.000151592	0.0016587	0.00119243	INS/IRS2/PRKAG2/IGF1/INSR/HK2/SLC35A3	7
BP	GO:0014854	response to inactivity	3/144	14/18670	0.000153685	0.00166945	0.00120016	PKM/MYOG/HDAC4	3
BP	GO:0030207	chondroitin sulfate catabolic process	3/144	14/18670	0.000153685	0.00166945	0.00120016	IDUA/VCAN/DCN	3
BP	GO:0051785	positive regulation of nuclear division	5/144	66/18670	0.000155883	0.00168723	0.00121295	INS/AURKA/IGF1/TGFA/INSR	5
BP	GO:0017038	protein import	8/144	199/18670	0.000158066	0.00170473	0.00122553	NUP35/GCKR/NUP85/NUP107/NUP155/NUP58/NUP93/NUP188	8
BP	GO:0009746	response to hexose	8/144	202/18670	0.00017513	0.00188202	0.00135298	GCKR/MLXIPL/IRS2/PFKFB2/GCK/PPARGC1A/PRKACA/PRKAA2	8
BP	GO:0001890	placenta development	7/144	152/18670	0.000178785	0.00191446	0.0013763	STC2/STC1/NSDHL/ANG/ARNT/DCN/EGFR	7
BP	GO:0043406	positive regulation of MAP kinase activity	9/144	258/18670	0.000179609	0.00191646	0.00137774	CDK1/MIF/VEGFA/ADORA2B/IGF1/TGFA/P2RX7/INSR/EGFR	9
BP	GO:0030201	heparan sulfate proteoglycan metabolic process	4/144	37/18670	0.000183928	0.00194873	0.00140093	HS6ST2/GPC1/B3GALT6/EXT1	4
BP	GO:0045923	positive regulation of fatty acid metabolic process	4/144	37/18670	0.000183928	0.00194873	0.00140093	MLXIPL/IRS2/PPARGC1A/PPARA	4
BP	GO:0071156	regulation of cell cycle arrest	6/144	108/18670	0.000190263	0.00198887	0.00142979	CDK1/MIF/AURKA/MLXIPL/MYOG/PRKACA	6
BP	GO:1904659	glucose transmembrane transport	6/144	108/18670	0.000190263	0.00198887	0.00142979	INS/IRS2/PRKAG2/IGF1/INSR/HK2	6
BP	GO:0014874	response to stimulus involved in regulation of muscle adaptation	3/144	15/18670	0.000191022	0.00198887	0.00142979	MYOG/HDAC4/PPARGC1A	3
BP	GO:0019471	4-hydroxyproline metabolic process	3/144	15/18670	0.000191022	0.00198887	0.00142979	ERO1A/P4HA1/EGLN3	3
BP	GO:0046321	positive regulation of fatty acid oxidation	3/144	15/18670	0.000191022	0.00198887	0.00142979	IRS2/PPARGC1A/PPARA	3
BP	GO:0006979	response to oxidative stress	12/144	451/18670	0.000199035	0.00206516	0.00148464	CDK1/INS/STC2/FUT8/ANKZF1/MET/ERO1A/PPP2CB/ARNT/EGFR/PPARGC1A/PRKAA2	12
BP	GO:0050679	positive regulation of epithelial cell proliferation	8/144	206/18670	0.000200213	0.00207025	0.00148829	SOX9/VEGFA/ANG/IGF1/TGFA/B4GALT1/ARNT/EGFR	8
BP	GO:1901861	regulation of muscle tissue development	7/144	155/18670	0.000201664	0.0020781	0.00149394	CDK1/GPC1/MYOG/IGF1/HDAC4/PPARGC1A/PPARA	7
BP	GO:0046326	positive regulation of glucose import	4/144	38/18670	0.000204342	0.00209851	0.00150861	INS/IRS2/IGF1/INSR	4
BP	GO:0034284	response to monosaccharide	8/144	207/18670	0.000206925	0.00211781	0.00152249	GCKR/MLXIPL/IRS2/PFKFB2/GCK/PPARGC1A/PRKACA/PRKAA2	8
BP	GO:0031330	negative regulation of cellular catabolic process	9/144	264/18670	0.000213154	0.00217417	0.001563	INS/DDIT4/OGT/MYOG/MET/HDAC4/PPARGC1A/CBFA2T3/PPARA	9
BP	GO:1904951	positive regulation of establishment of protein localization	12/144	456/18670	0.000220226	0.00223872	0.0016094	INS/MIF/PPIA/GPI/IRS2/ANG/IGF1/PFKFB2/P2RX7/GCK/EGFR/PRKACA	12
BP	GO:0008645	hexose transmembrane transport	6/144	112/18670	0.00023196	0.00234479	0.00168566	INS/IRS2/PRKAG2/IGF1/INSR/HK2	6
BP	GO:0006047	UDP-N-acetylglucosamine metabolic process	3/144	16/18670	0.000233777	0.00234479	0.00168566	GNPDA1/GNE/SLC35A3	3
BP	GO:0050655	dermatan sulfate proteoglycan metabolic process	3/144	16/18670	0.000233777	0.00234479	0.00168566	IDUA/VCAN/DCN	3
BP	GO:1902001	fatty acid transmembrane transport	3/144	16/18670	0.000233777	0.00234479	0.00168566	IRS2/PRKAG2/PRKAA2	3
BP	GO:0015749	monosaccharide transmembrane transport	6/144	114/18670	0.000255343	0.00255258	0.00183504	INS/IRS2/PRKAG2/IGF1/INSR/HK2	6
BP	GO:0015718	monocarboxylic acid transport	7/144	162/18670	0.000264321	0.00263358	0.00189327	MIF/IRS2/PRKAG2/NCOR1/P2RX7/PRKAA2/PPARA	7
BP	GO:0001503	ossification	11/144	398/18670	0.000267049	0.00265198	0.0019065	SOX9/VCAN/STC1/MYOG/IGFBP3/IGF1/HDAC4/P2RX7/EXT1/EGFR/PRKACA	11
BP	GO:0045931	positive regulation of mitotic cell cycle	7/144	163/18670	0.000274425	0.00271627	0.00195272	CDK1/INS/AURKA/IGF1/TGFA/INSR/EGFR	7
BP	GO:0043403	skeletal muscle tissue regeneration	4/144	41/18670	0.000275366	0.00271665	0.00195299	PKM/ENO3/MYOG/IGF1	4
BP	GO:0034219	carbohydrate transmembrane transport	6/144	116/18670	0.000280541	0.00275865	0.00198318	INS/IRS2/PRKAG2/IGF1/INSR/HK2	6
BP	GO:0045721	negative regulation of gluconeogenesis	3/144	17/18670	0.000282271	0.00276663	0.00198892	INS/PGP/GCK	3
BP	GO:0006487	protein N-linked glycosylation	5/144	78/18670	0.000341966	0.00334083	0.00240171	SRD5A3/FUT8/B4GALT1/ENTPD5/GAL3ST1	5
BP	GO:0010828	positive regulation of glucose transmembrane transport	4/144	44/18670	0.000362573	0.00353069	0.0025382	INS/IRS2/IGF1/INSR	4
BP	GO:0006937	regulation of muscle contraction	7/144	171/18670	0.000366963	0.00356191	0.00256064	ENO1/STC1/ADORA2B/HDAC4/PKP2/PRKACA/DSC2	7
BP	GO:0055002	striated muscle cell development	7/144	173/18670	0.000393613	0.0038083	0.00273777	CDK1/MYOG/VEGFA/HOMER1/IGF1/HDAC4/PPARA	7
BP	GO:0044275	cellular carbohydrate catabolic process	4/144	45/18670	0.000395579	0.00381506	0.00274263	INS/MIOX/AGL/PGM1	4
BP	GO:1905939	regulation of gonad development	3/144	19/18670	0.000397714	0.0038234	0.00274862	SOX9/CITED2/INSR	3
BP	GO:0006941	striated muscle contraction	7/144	174/18670	0.000407507	0.00390506	0.00280733	NUP155/STC1/HOMER1/HDAC4/PKP2/PRKACA/DSC2	7
BP	GO:0055117	regulation of cardiac muscle contraction	5/144	82/18670	0.000431224	0.00411921	0.00296129	STC1/HDAC4/PKP2/PRKACA/DSC2	5
BP	GO:0097062	dendritic spine maintenance	3/144	20/18670	0.000465263	0.00443031	0.00318493	INS/HOMER1/INSR	3
BP	GO:0006936	muscle contraction	10/144	360/18670	0.000489439	0.00464581	0.00333985	ENO1/NUP155/STC1/HOMER1/ADORA2B/HDAC4/CACNA1H/PKP2/PRKACA/DSC2	10
BP	GO:0007050	cell cycle arrest	8/144	237/18670	0.000512617	0.00485052	0.00348702	CDK1/MIF/AURKA/MLXIPL/MYOG/PRKAG2/PRKACA/PRKAA2	8
BP	GO:0010565	regulation of cellular ketone metabolic process	7/144	181/18670	0.000516124	0.00486062	0.00349428	INS/MLXIPL/IRS2/PRKAG2/PPARGC1A/PRKAA2/PPARA	7
BP	GO:0090068	positive regulation of cell cycle process	9/144	298/18670	0.000516916	0.00486062	0.00349428	CDK1/INS/AURKA/MYOG/IGF1/TGFA/INSR/EGFR/PRKACA	9
BP	GO:0006066	alcohol metabolic process	10/144	364/18670	0.000533321	0.00499926	0.00359395	SRD5A3/MIOX/NSDHL/GALK1/PGP/IGF1/VLDLR/CACNA1H/GOT1/PRKAA2	10
BP	GO:0042446	hormone biosynthetic process	5/144	86/18670	0.000537017	0.00501828	0.00360762	SRD5A3/STC2/CACNA1H/ARNT/PPARGC1A	5
BP	GO:0051900	regulation of mitochondrial depolarization	3/144	21/18670	0.00053975	0.0050282	0.00361475	P2RX7/DCN/GOT1	3
BP	GO:0033002	muscle cell proliferation	8/144	239/18670	0.000541806	0.00503177	0.00361732	CDK1/MYOG/IGFBP3/ANG/IGF1/HDAC4/EGFR/PPARGC1A	8
BP	GO:0045995	regulation of embryonic development	6/144	132/18670	0.000559805	0.00518293	0.00372599	CDK1/COL5A1/IGF1/PRKACB/INSR/PRKACA	6
BP	GO:0043434	response to peptide hormone	11/144	436/18670	0.000575069	0.00530792	0.00381584	INS/STC2/PKM/OGT/IRS2/PRKACB/INSR/GCK/PRKACA/GOT1/PPARA	11
BP	GO:0035690	cellular response to drug	10/144	369/18670	0.000592719	0.00545411	0.00392093	CDK1/AGRN/SOX9/DDIT4/ANKZF1/MET/P2RX7/EGFR/PPARGC1A/PRKAA2	10
BP	GO:1901863	positive regulation of muscle tissue development	5/144	88/18670	0.000596698	0.00547397	0.00393522	CDK1/GPC1/MYOG/IGF1/PPARGC1A	5
BP	GO:0055001	muscle cell development	7/144	186/18670	0.000606955	0.00555115	0.0039907	CDK1/MYOG/VEGFA/HOMER1/IGF1/HDAC4/PPARA	7
BP	GO:0005980	glycogen catabolic process	3/144	22/18670	0.000621455	0.00566654	0.00407365	INS/AGL/PGM1	3
BP	GO:0001889	liver development	6/144	135/18670	0.000630295	0.00572978	0.00411912	SOX9/PKM/AURKA/MET/CITED2/EGFR	6
BP	GO:0060048	cardiac muscle contraction	6/144	137/18670	0.000680984	0.00617193	0.00443698	NUP155/STC1/HDAC4/PKP2/PRKACA/DSC2	6
BP	GO:0006998	nuclear envelope organization	4/144	52/18670	0.000689395	0.00621887	0.00447072	CDK1/NUP155/SPAG4/NUP93	4
BP	GO:0042180	cellular ketone metabolic process	8/144	248/18670	0.000690297	0.00621887	0.00447072	INS/MLXIPL/IRS2/PRKAG2/CACNA1H/PPARGC1A/PRKAA2/PPARA	8
BP	GO:0061008	hepaticobiliary system development	6/144	138/18670	0.000707484	0.00628926	0.00452132	SOX9/PKM/AURKA/MET/CITED2/EGFR	6
BP	GO:0007530	sex determination	3/144	23/18670	0.000710651	0.00628926	0.00452132	SOX9/CITED2/INSR	3
BP	GO:0009067	aspartate family amino acid biosynthetic process	3/144	23/18670	0.000710651	0.00628926	0.00452132	PLOD1/PLOD2/GOT1	3
BP	GO:0009251	glucan catabolic process	3/144	23/18670	0.000710651	0.00628926	0.00452132	INS/AGL/PGM1	3
BP	GO:0019400	alditol metabolic process	3/144	23/18670	0.000710651	0.00628926	0.00452132	GALK1/PGP/GOT1	3
BP	GO:0051882	mitochondrial depolarization	3/144	23/18670	0.000710651	0.00628926	0.00452132	P2RX7/DCN/GOT1	3
BP	GO:0006720	isoprenoid metabolic process	6/144	139/18670	0.000734776	0.00646474	0.00464748	SRD5A3/AGRN/GPC1/SDC3/EGFR/SDC2	6
BP	GO:0033135	regulation of peptidyl-serine phosphorylation	6/144	139/18670	0.000734776	0.00646474	0.00464748	MIF/DDIT4/MLXIPL/VEGFA/CD44/EGFR	6
BP	GO:0009066	aspartate family amino acid metabolic process	4/144	54/18670	0.000795791	0.00696086	0.00500413	PLOD1/PLOD2/GOT1/OGDH	4
BP	GO:0030199	collagen fibril organization	4/144	54/18670	0.000795791	0.00696086	0.00500413	COL5A1/PLOD1/P4HA1/PLOD2	4
BP	GO:0014850	response to muscle activity	3/144	24/18670	0.000807603	0.0070437	0.00506369	MYOG/PPARGC1A/PRKAA2	3
BP	GO:1901653	cellular response to peptide	10/144	385/18670	0.00082079	0.00713803	0.0051315	INS/PKM/OGT/IRS2/IGF1/PRKACB/INSR/GCK/PRKACA/GOT1	10
BP	GO:0044070	regulation of anion transport	5/144	95/18670	0.000845336	0.00733031	0.00526973	MIF/STC1/IRS2/NCOR1/P2RX7	5
BP	GO:0009749	response to glucose	7/144	197/18670	0.000851602	0.00735534	0.00528773	MLXIPL/IRS2/PFKFB2/GCK/PPARGC1A/PRKACA/PRKAA2	7
BP	GO:0043954	cellular component maintenance	4/144	55/18670	0.000853112	0.00735534	0.00528773	INS/HOMER1/INSR/PKP2	4
BP	GO:0031099	regeneration	7/144	198/18670	0.000877217	0.00752178	0.00540738	CDK1/PKM/AURKA/ENO3/MYOG/IGF1/EGFR	7
BP	GO:0071375	cellular response to peptide hormone stimulus	9/144	321/18670	0.000877416	0.00752178	0.00540738	INS/PKM/OGT/IRS2/PRKACB/INSR/GCK/PRKACA/GOT1	9
BP	GO:0090277	positive regulation of peptide hormone secretion	5/144	96/18670	0.000886321	0.00757654	0.00544674	INS/IRS2/PFKFB2/GCK/EGFR	5
BP	GO:0014706	striated muscle tissue development	10/144	390/18670	0.000905343	0.00771721	0.00554787	CDK1/GPC1/MYOG/VEGFA/HOMER1/IGF1/HDAC4/DCN/PKP2/PPARA	10
BP	GO:0002053	positive regulation of mesenchymal cell proliferation	3/144	25/18670	0.000912569	0.00771931	0.00554938	SOX9/VEGFA/IRS2	3
BP	GO:0044247	cellular polysaccharide catabolic process	3/144	25/18670	0.000912569	0.00771931	0.00554938	INS/AGL/PGM1	3
BP	GO:0086065	cell communication involved in cardiac conduction	4/144	56/18670	0.000913284	0.00771931	0.00554938	NUP155/PKP2/PRKACA/DSC2	4
BP	GO:0006942	regulation of striated muscle contraction	5/144	97/18670	0.000928768	0.00782819	0.00562765	STC1/HDAC4/PKP2/PRKACA/DSC2	5
BP	GO:0018208	peptidyl-proline modification	4/144	57/18670	0.000976385	0.00820654	0.00589965	FKBP4/PPIA/P4HA1/EGLN3	4
BP	GO:0045992	negative regulation of embryonic development	3/144	26/18670	0.0010258	0.00859786	0.00618096	COL5A1/PRKACB/PRKACA	3
BP	GO:0055081	anion homeostasis	4/144	58/18670	0.00104249	0.00871347	0.00626408	INS/MLXIPL/GOT1/PRKAA2	4
BP	GO:0050708	regulation of protein secretion	11/144	472/18670	0.00109878	0.00915852	0.00658402	INS/MIF/PPIA/GPI/IRS2/ANG/IGF1/PFKFB2/P2RX7/GCK/EGFR	11
BP	GO:0032890	regulation of organic acid transport	4/144	59/18670	0.00111168	0.00921715	0.00662617	MIF/IRS2/NCOR1/P2RX7	4
BP	GO:0072331	signal transduction by p53 class mediator	8/144	267/18670	0.00111194	0.00921715	0.00662617	CDK1/PAXIP1/MIF/DDIT4/AURKA/CD44/PRKAG2/PRKAA2	8
BP	GO:0016999	antibiotic metabolic process	6/144	151/18670	0.00112999	0.00931544	0.00669684	NANP/GNPDA1/ME2/GNE/EGFR/OGDH	6
BP	GO:0055088	lipid homeostasis	6/144	151/18670	0.00112999	0.00931544	0.00669684	INS/GCKR/MLXIPL/IRS2/GOT1/PRKAA2	6
BP	GO:0000272	polysaccharide catabolic process	3/144	27/18670	0.00114754	0.00940856	0.00676378	INS/AGL/PGM1	3
BP	GO:0046885	regulation of hormone biosynthetic process	3/144	27/18670	0.00114754	0.00940856	0.00676378	STC2/ARNT/PPARGC1A	3
BP	GO:0071902	positive regulation of protein serine/threonine kinase activity	9/144	334/18670	0.00115825	0.00945635	0.00679813	CDK1/MIF/VEGFA/ADORA2B/IGF1/TGFA/P2RX7/INSR/EGFR	9
BP	GO:0043491	protein kinase B signaling	8/144	269/18670	0.00116622	0.00945635	0.00679813	INS/SOX9/MET/IRS2/IGF1/TGFA/INSR/EGFR	8
BP	GO:0007623	circadian rhythm	7/144	208/18670	0.0011683	0.00945635	0.00679813	CDK1/OGT/NCOR1/EGFR/PPARGC1A/PRKAA2/PPARA	7
BP	GO:0000187	activation of MAPK activity	6/144	152/18670	0.00116908	0.00945635	0.00679813	CDK1/ADORA2B/IGF1/TGFA/P2RX7/INSR	6
BP	GO:0016202	regulation of striated muscle tissue development	6/144	152/18670	0.00116908	0.00945635	0.00679813	CDK1/GPC1/MYOG/IGF1/HDAC4/PPARA	6
BP	GO:0007548	sex differentiation	8/144	270/18670	0.00119414	0.00963317	0.00692524	BIK/FKBP4/SOX9/NUP107/VEGFA/ANG/CITED2/INSR	8
BP	GO:0051701	interaction with host	7/144	209/18670	0.00120113	0.00965274	0.00693932	CDK1/PPIA/CLDN9/MET/PC/INSR/EGFR	7
BP	GO:0043900	regulation of multi-organism process	10/144	405/18670	0.00120298	0.00965274	0.00693932	MIF/PPIA/AURKA/ISG20/IGF1/HDAC4/CACNA1H/PC/P2RX7/B4GALT1	10
BP	GO:0043405	regulation of MAP kinase activity	9/144	337/18670	0.00123241	0.00986256	0.00709015	CDK1/MIF/VEGFA/ADORA2B/IGF1/TGFA/P2RX7/INSR/EGFR	9
BP	GO:0032868	response to insulin	8/144	272/18670	0.00125159	0.00998946	0.00718138	INS/PKM/OGT/IRS2/INSR/GCK/GOT1/PPARA	8
BP	GO:0007517	muscle organ development	10/144	410/18670	0.00131837	0.0104946	0.00754455	CDK1/GPC1/MYOG/HOMER1/IGF1/HDAC4/CACNA1H/DCN/PKP2/PPARA	10
BP	GO:0048634	regulation of muscle organ development	6/144	156/18670	0.00133591	0.0105976	0.00761857	CDK1/GPC1/MYOG/IGF1/HDAC4/PPARA	6
BP	GO:0016054	organic acid catabolic process	8/144	275/18670	0.00134187	0.0105976	0.00761857	IDUA/GNPDA1/HMMR/CD44/IRS2/GOT1/PPARA/OGDH	8
BP	GO:0046395	carboxylic acid catabolic process	8/144	275/18670	0.00134187	0.0105976	0.00761857	IDUA/GNPDA1/HMMR/CD44/IRS2/GOT1/PPARA/OGDH	8
BP	GO:0007411	axon guidance	8/144	276/18670	0.00137309	0.0108158	0.00777542	AGRN/GPC1/EFNA3/ARTN/VEGFA/IRS2/VLDLR/EXT1	8
BP	GO:0097485	neuron projection guidance	8/144	277/18670	0.00140488	0.0110373	0.00793469	AGRN/GPC1/EFNA3/ARTN/VEGFA/IRS2/VLDLR/EXT1	8
BP	GO:0007263	nitric oxide mediated signal transduction	3/144	29/18670	0.00141748	0.0111041	0.0079827	INS/VEGFA/EGFR	3
BP	GO:0046686	response to cadmium ion	4/144	63/18670	0.00142077	0.0111041	0.0079827	CDK1/CYB5A/EGFR/GOT1	4
BP	GO:0030330	DNA damage response, signal transduction by p53 class mediator	5/144	107/18670	0.00144087	0.011203	0.00805381	CDK1/PAXIP1/MIF/AURKA/CD44	5
BP	GO:0043502	regulation of muscle adaptation	5/144	107/18670	0.00144087	0.011203	0.00805381	MYOG/IGF1/HDAC4/PPARGC1A/PPARA	5
BP	GO:0032869	cellular response to insulin stimulus	7/144	216/18670	0.0014517	0.0112582	0.00809347	INS/PKM/OGT/IRS2/INSR/GCK/GOT1	7
BP	GO:0008406	gonad development	7/144	217/18670	0.0014906	0.0115006	0.00826771	BIK/SOX9/NUP107/VEGFA/ANG/CITED2/INSR	7
BP	GO:0043393	regulation of protein binding	7/144	217/18670	0.0014906	0.0115006	0.00826771	AURKA/MET/STMN1/HDAC4/PPP2CB/PRKACA/PPARA	7
BP	GO:0007584	response to nutrient	7/144	219/18670	0.00157083	0.0120886	0.00869044	STC2/PKM/OGT/STC1/P2RX7/AGL/EGFR	7
BP	GO:0014823	response to activity	4/144	65/18670	0.00159579	0.0122493	0.00880598	CDK1/MYOG/PPARGC1A/PRKAA2	4
BP	GO:0016101	diterpenoid metabolic process	5/144	110/18670	0.00162862	0.0124695	0.00896427	AGRN/GPC1/SDC3/EGFR/SDC2	5
BP	GO:1901605	alpha-amino acid metabolic process	7/144	222/18670	0.00169745	0.0129635	0.00931944	ERO1A/PLOD1/P4HA1/PLOD2/EGLN3/GOT1/OGDH	7
BP	GO:0031667	response to nutrient levels	11/144	499/18670	0.00170981	0.0130249	0.00936352	STC2/PKM/OGT/STC1/P2RX7/AGL/EGFR/PPARGC1A/PRKAA2/PPARA/DSC2	11
BP	GO:0043457	regulation of cellular respiration	3/144	31/18670	0.0017242	0.0131013	0.0094185	CDK1/PPARGC1A/CBFA2T3	3
BP	GO:0002791	regulation of peptide secretion	11/144	500/18670	0.00173691	0.0131647	0.00946401	INS/MIF/PPIA/GPI/IRS2/ANG/IGF1/PFKFB2/P2RX7/GCK/EGFR	11
BP	GO:0045137	development of primary sexual characteristics	7/144	223/18670	0.00174138	0.0131654	0.00946452	BIK/SOX9/NUP107/VEGFA/ANG/CITED2/INSR	7
BP	GO:0014902	myotube differentiation	5/144	112/18670	0.00176339	0.0132983	0.00956011	MYOG/HOMER1/IGF1/HDAC4/CACNA1H	5
BP	GO:0048747	muscle fiber development	4/144	67/18670	0.00178527	0.0134297	0.00965458	MYOG/VEGFA/HOMER1/HDAC4	4
BP	GO:0050891	multicellular organismal water homeostasis	4/144	68/18670	0.00188563	0.0140215	0.01008	MET/STMN1/PRKACB/PRKACA	4
BP	GO:0050918	positive chemotaxis	4/144	68/18670	0.00188563	0.0140215	0.01008	MIF/MET/ARTN/VEGFA	4
BP	GO:0006739	NADP metabolic process	3/144	32/18670	0.0018919	0.0140215	0.01008	ME1/ME2/GCK	3
BP	GO:0015012	heparan sulfate proteoglycan biosynthetic process	3/144	32/18670	0.0018919	0.0140215	0.01008	HS6ST2/B3GALT6/EXT1	3
BP	GO:0035587	purinergic receptor signaling pathway	3/144	32/18670	0.0018919	0.0140215	0.01008	GPR87/ADORA2B/P2RX7	3
BP	GO:0048741	skeletal muscle fiber development	3/144	32/18670	0.0018919	0.0140215	0.01008	MYOG/HOMER1/HDAC4	3
BP	GO:0032963	collagen metabolic process	5/144	115/18670	0.00198063	0.0146391	0.010524	COL5A1/PLOD1/PLOD2/P2RX7/GOT1	5
BP	GO:0015909	long-chain fatty acid transport	4/144	69/18670	0.00198983	0.0146391	0.010524	MIF/IRS2/PRKAG2/PRKAA2	4
BP	GO:0086003	cardiac muscle cell contraction	4/144	69/18670	0.00198983	0.0146391	0.010524	NUP155/STC1/PKP2/DSC2	4
BP	GO:0051146	striated muscle cell differentiation	8/144	293/18670	0.00199821	0.0146649	0.0105426	CDK1/MYOG/VEGFA/HOMER1/IGF1/HDAC4/CACNA1H/PPARA	8
BP	GO:0048660	regulation of smooth muscle cell proliferation	6/144	169/18670	0.0020059	0.0146856	0.0105574	IGFBP3/ANG/IGF1/HDAC4/EGFR/PPARGC1A	6
BP	GO:0010464	regulation of mesenchymal cell proliferation	3/144	33/18670	0.00206941	0.0150407	0.0108127	SOX9/VEGFA/IRS2	3
BP	GO:0010737	protein kinase A signaling	3/144	33/18670	0.00206941	0.0150407	0.0108127	MIF/PRKACB/PRKACA	3
BP	GO:2000758	positive regulation of peptidyl-lysine acetylation	3/144	33/18670	0.00206941	0.0150407	0.0108127	PAXIP1/PPARGC1A/PRKAA2	3
BP	GO:0048659	smooth muscle cell proliferation	6/144	171/18670	0.00212813	0.0154302	0.0110927	IGFBP3/ANG/IGF1/HDAC4/EGFR/PPARGC1A	6
BP	GO:0010822	positive regulation of mitochondrion organization	5/144	117/18670	0.00213594	0.0154496	0.0111067	BIK/DCN/FAM162A/PPARGC1A/HK2	5
BP	GO:1903522	regulation of blood circulation	8/144	297/18670	0.00217367	0.0156848	0.0112757	NUP155/STC1/HDAC4/CACNA1H/PKP2/EGFR/PRKACA/DSC2	8
BP	GO:0097009	energy homeostasis	3/144	34/18670	0.00225695	0.0162468	0.0116798	MLXIPL/PPARGC1A/PRKAA2	3
BP	GO:0006721	terpenoid metabolic process	5/144	120/18670	0.0023853	0.0171181	0.0123062	AGRN/GPC1/SDC3/EGFR/SDC2	5
BP	GO:0046165	alcohol biosynthetic process	6/144	175/18670	0.00238937	0.0171181	0.0123062	SRD5A3/NSDHL/PGP/CACNA1H/GOT1/PRKAA2	6
BP	GO:0031100	animal organ regeneration	4/144	73/18670	0.00244652	0.0174859	0.0125706	CDK1/PKM/AURKA/EGFR	4
BP	GO:0051897	positive regulation of protein kinase B signaling	6/144	176/18670	0.0024583	0.0175285	0.0126011	INS/MET/IRS2/TGFA/INSR/EGFR	6
BP	GO:0014877	response to muscle inactivity involved in regulation of muscle adaptation	2/144	10/18670	0.00255281	0.0177811	0.0127827	MYOG/HDAC4	2
BP	GO:0014894	response to denervation involved in regulation of muscle adaptation	2/144	10/18670	0.00255281	0.0177811	0.0127827	MYOG/HDAC4	2
BP	GO:0032000	positive regulation of fatty acid beta-oxidation	2/144	10/18670	0.00255281	0.0177811	0.0127827	IRS2/PPARA	2
BP	GO:0032308	positive regulation of prostaglandin secretion	2/144	10/18670	0.00255281	0.0177811	0.0127827	MIF/P2RX7	2
BP	GO:0033131	regulation of glucokinase activity	2/144	10/18670	0.00255281	0.0177811	0.0127827	GCKR/PFKFB2	2
BP	GO:0035865	cellular response to potassium ion	2/144	10/18670	0.00255281	0.0177811	0.0127827	CACNA1H/PPARGC1A	2
BP	GO:0051901	positive regulation of mitochondrial depolarization	2/144	10/18670	0.00255281	0.0177811	0.0127827	P2RX7/DCN	2
BP	GO:0060281	regulation of oocyte development	2/144	10/18670	0.00255281	0.0177811	0.0127827	AURKA/IGF1	2
BP	GO:1905879	regulation of oogenesis	2/144	10/18670	0.00255281	0.0177811	0.0127827	AURKA/IGF1	2
BP	GO:1990535	neuron projection maintenance	2/144	10/18670	0.00255281	0.0177811	0.0127827	INS/INSR	2
BP	GO:0043500	muscle adaptation	5/144	122/18670	0.00256289	0.01781	0.0128035	MYOG/IGF1/HDAC4/PPARGC1A/PPARA	5
BP	GO:0030104	water homeostasis	4/144	74/18670	0.00257104	0.0178255	0.0128146	MET/STMN1/PRKACB/PRKACA	4
BP	GO:0071392	cellular response to estradiol stimulus	3/144	36/18670	0.00266286	0.0184197	0.0132418	MYOG/EGFR/PPARGC1A	3
BP	GO:0008637	apoptotic mitochondrial changes	5/144	124/18670	0.00274989	0.018978	0.0136432	BIK/IGF1/PPP2CB/FAM162A/HK2	5
BP	GO:0038083	peptidyl-tyrosine autophosphorylation	3/144	37/18670	0.00288159	0.0198414	0.0142639	VEGFA/INSR/EGFR	3
BP	GO:0010821	regulation of mitochondrion organization	6/144	182/18670	0.00290376	0.0199485	0.0143409	BIK/IGF1/DCN/FAM162A/PPARGC1A/HK2	6
BP	GO:0061418	regulation of transcription from RNA polymerase II promoter in response to hypoxia	4/144	77/18670	0.00297059	0.020361	0.0146375	VEGFA/ARNT/CITED2/EGLN3	4
BP	GO:0042692	muscle cell differentiation	9/144	385/18670	0.00303774	0.0205847	0.0147982	CDK1/SOX9/MYOG/VEGFA/HOMER1/IGF1/HDAC4/CACNA1H/PPARA	9
BP	GO:0048545	response to steroid hormone	9/144	385/18670	0.00303774	0.0205847	0.0147982	FKBP4/DDIT4/STC1/NCOR1/AGL/EGFR/PPARGC1A/GOT1/PPARA	9
BP	GO:0032368	regulation of lipid transport	5/144	127/18670	0.00304865	0.0205847	0.0147982	MIF/IRS2/NCOR1/P2RX7/PPARA	5
BP	GO:0005984	disaccharide metabolic process	2/144	11/18670	0.00310436	0.0205847	0.0147982	IDUA/B4GALT1	2
BP	GO:0006853	carnitine shuttle	2/144	11/18670	0.00310436	0.0205847	0.0147982	PRKAG2/PRKAA2	2
BP	GO:0009629	response to gravity	2/144	11/18670	0.00310436	0.0205847	0.0147982	PKM/MYOG	2
BP	GO:0032306	regulation of prostaglandin secretion	2/144	11/18670	0.00310436	0.0205847	0.0147982	MIF/P2RX7	2
BP	GO:0033235	positive regulation of protein sumoylation	2/144	11/18670	0.00310436	0.0205847	0.0147982	HDAC4/ARNT	2
BP	GO:0035404	histone-serine phosphorylation	2/144	11/18670	0.00310436	0.0205847	0.0147982	AURKA/PRKAA2	2
BP	GO:0046886	positive regulation of hormone biosynthetic process	2/144	11/18670	0.00310436	0.0205847	0.0147982	ARNT/PPARGC1A	2
BP	GO:0048742	regulation of skeletal muscle fiber development	2/144	11/18670	0.00310436	0.0205847	0.0147982	MYOG/HDAC4	2
BP	GO:1903299	regulation of hexokinase activity	2/144	11/18670	0.00310436	0.0205847	0.0147982	GCKR/PFKFB2	2
BP	GO:1905941	positive regulation of gonad development	2/144	11/18670	0.00310436	0.0205847	0.0147982	SOX9/CITED2	2
BP	GO:0016572	histone phosphorylation	3/144	38/18670	0.00311107	0.0205847	0.0147982	CDK1/AURKA/PRKAA2	3
BP	GO:0032350	regulation of hormone metabolic process	3/144	38/18670	0.00311107	0.0205847	0.0147982	STC2/ARNT/PPARGC1A	3
BP	GO:0042246	tissue regeneration	4/144	78/18670	0.00311267	0.0205847	0.0147982	PKM/ENO3/MYOG/IGF1	4
BP	GO:0022900	electron transport chain	6/144	186/18670	0.00323263	0.0212844	0.0153013	CDK1/ME1/TSTA3/ME2/CYB5A/PPARGC1A	6
BP	GO:0070507	regulation of microtubule cytoskeleton organization	6/144	186/18670	0.00323263	0.0212844	0.0153013	FKBP4/RAE1/AURKA/MET/STMN1/PRKAA2	6
BP	GO:0071260	cellular response to mechanical stimulus	4/144	79/18670	0.00325933	0.0214134	0.015394	SOX9/HDAC4/EGFR/GOT1	4
BP	GO:0071383	cellular response to steroid hormone stimulus	7/144	250/18670	0.00330015	0.0216343	0.0155528	FKBP4/DDIT4/STC1/NCOR1/EGFR/PPARGC1A/PPARA	7
BP	GO:0008016	regulation of heart contraction	7/144	251/18670	0.00337341	0.0220665	0.0158635	NUP155/STC1/HDAC4/CACNA1H/PKP2/PRKACA/DSC2	7
BP	GO:0043902	positive regulation of multi-organism process	6/144	188/18670	0.00340712	0.0222134	0.0159691	MIF/PPIA/AURKA/HDAC4/CACNA1H/PC	6
BP	GO:0070509	calcium ion import	4/144	80/18670	0.00341063	0.0222134	0.0159691	STC1/HOMER1/CACNA1H/GCK	4
BP	GO:0046887	positive regulation of hormone secretion	5/144	131/18670	0.00348257	0.022633	0.0162707	INS/IRS2/PFKFB2/GCK/EGFR	5
BP	GO:0002903	negative regulation of B cell apoptotic process	2/144	12/18670	0.00370644	0.0235362	0.0169201	MIF/IRS2	2
BP	GO:0014889	muscle atrophy	2/144	12/18670	0.00370644	0.0235362	0.0169201	MYOG/PPARGC1A	2
BP	GO:0030208	dermatan sulfate biosynthetic process	2/144	12/18670	0.00370644	0.0235362	0.0169201	VCAN/DCN	2
BP	GO:0032429	regulation of phospholipase A2 activity	2/144	12/18670	0.00370644	0.0235362	0.0169201	ANG/EGFR	2
BP	GO:0070493	thrombin-activated receptor signaling pathway	2/144	12/18670	0.00370644	0.0235362	0.0169201	MET/STMN1	2
BP	GO:0071107	response to parathyroid hormone	2/144	12/18670	0.00370644	0.0235362	0.0169201	HDAC4/PRKACA	2
BP	GO:1900402	regulation of carbohydrate metabolic process by regulation of transcription from RNA polymerase II promoter	2/144	12/18670	0.00370644	0.0235362	0.0169201	NCOR1/PPARA	2
BP	GO:1902950	regulation of dendritic spine maintenance	2/144	12/18670	0.00370644	0.0235362	0.0169201	INS/HOMER1	2
BP	GO:1904181	positive regulation of membrane depolarization	2/144	12/18670	0.00370644	0.0235362	0.0169201	P2RX7/DCN	2
BP	GO:1904424	regulation of GTP binding	2/144	12/18670	0.00370644	0.0235362	0.0169201	MET/STMN1	2
BP	GO:0042770	signal transduction in response to DNA damage	5/144	133/18670	0.00371542	0.0235362	0.0169201	CDK1/PAXIP1/MIF/AURKA/CD44	5
BP	GO:0071333	cellular response to glucose stimulus	5/144	133/18670	0.00371542	0.0235362	0.0169201	MLXIPL/IRS2/PPARGC1A/PRKACA/PRKAA2	5
BP	GO:0071158	positive regulation of cell cycle arrest	4/144	82/18670	0.00372743	0.0235627	0.0169391	CDK1/AURKA/MYOG/PRKACA	4
BP	GO:0030260	entry into host cell	5/144	134/18670	0.00383593	0.0240465	0.0172869	CDK1/PPIA/CLDN9/MET/EGFR	5
BP	GO:0044409	entry into host	5/144	134/18670	0.00383593	0.0240465	0.0172869	CDK1/PPIA/CLDN9/MET/EGFR	5
BP	GO:0051806	entry into cell of other organism involved in symbiotic interaction	5/144	134/18670	0.00383593	0.0240465	0.0172869	CDK1/PPIA/CLDN9/MET/EGFR	5
BP	GO:0051828	entry into other organism involved in symbiotic interaction	5/144	134/18670	0.00383593	0.0240465	0.0172869	CDK1/PPIA/CLDN9/MET/EGFR	5
BP	GO:0050873	brown fat cell differentiation	3/144	41/18670	0.00386564	0.0241322	0.0173485	INS/ERO1A/PPARGC1A	3
BP	GO:1902893	regulation of pri-miRNA transcription by RNA polymerase II	3/144	41/18670	0.00386564	0.0241322	0.0173485	SOX9/HDAC4/PPARA	3
BP	GO:0071331	cellular response to hexose stimulus	5/144	135/18670	0.00395923	0.0246653	0.0177318	MLXIPL/IRS2/PPARGC1A/PRKACA/PRKAA2	5
BP	GO:0014910	regulation of smooth muscle cell migration	4/144	84/18670	0.00406363	0.0252113	0.0181243	IGFBP3/IGF1/HDAC4/PPARGC1A	4
BP	GO:0045445	myoblast differentiation	4/144	84/18670	0.00406363	0.0252113	0.0181243	SOX9/MYOG/IGFBP3/IGF1	4
BP	GO:0071326	cellular response to monosaccharide stimulus	5/144	136/18670	0.00408533	0.0252938	0.0181836	MLXIPL/IRS2/PPARGC1A/PRKACA/PRKAA2	5
BP	GO:0051235	maintenance of location	8/144	330/18670	0.00412792	0.0255049	0.0183354	KDELR3/SPAG4/ERO1A/MXI1/P2RX7/PRKACA/HK2/PPARA	8
BP	GO:0006694	steroid biosynthetic process	6/144	196/18670	0.00417599	0.0257491	0.0185109	SRD5A3/NSDHL/PRKAG2/CACNA1H/PPARGC1A/PRKAA2	6
BP	GO:0015849	organic acid transport	8/144	333/18670	0.00435699	0.0264395	0.0190073	MIF/PPFIA4/IRS2/PRKAG2/NCOR1/P2RX7/PRKAA2/PPARA	8
BP	GO:0046942	carboxylic acid transport	8/144	333/18670	0.00435699	0.0264395	0.0190073	MIF/PPFIA4/IRS2/PRKAG2/NCOR1/P2RX7/PRKAA2/PPARA	8
BP	GO:0001886	endothelial cell morphogenesis	2/144	13/18670	0.00435826	0.0264395	0.0190073	STC1/MET	2
BP	GO:0019511	peptidyl-proline hydroxylation	2/144	13/18670	0.00435826	0.0264395	0.0190073	P4HA1/EGLN3	2
BP	GO:0031115	negative regulation of microtubule polymerization	2/144	13/18670	0.00435826	0.0264395	0.0190073	FKBP4/STMN1	2
BP	GO:0043568	positive regulation of insulin-like growth factor receptor signaling pathway	2/144	13/18670	0.00435826	0.0264395	0.0190073	IGFBP3/IGF1	2
BP	GO:0046415	urate metabolic process	2/144	13/18670	0.00435826	0.0264395	0.0190073	GCKR/PRPS1	2
BP	GO:0048875	chemical homeostasis within a tissue	2/144	13/18670	0.00435826	0.0264395	0.0190073	VEGFA/HOMER1	2
BP	GO:0051602	response to electrical stimulus	3/144	43/18670	0.00442533	0.026685	0.0191838	MYOG/P2RX7/PPARGC1A	3
BP	GO:0086004	regulation of cardiac muscle cell contraction	3/144	43/18670	0.00442533	0.026685	0.0191838	STC1/PKP2/DSC2	3
BP	GO:1901985	positive regulation of protein acetylation	3/144	43/18670	0.00442533	0.026685	0.0191838	PAXIP1/PPARGC1A/PRKAA2	3
BP	GO:0019216	regulation of lipid metabolic process	9/144	410/18670	0.00458172	0.0275728	0.019822	INS/ME1/MLXIPL/IRS2/PRKAG2/NCOR1/PPARGC1A/PRKAA2/PPARA	9
BP	GO:0045844	positive regulation of striated muscle tissue development	4/144	87/18670	0.00460547	0.0276053	0.0198453	CDK1/GPC1/MYOG/IGF1	4
BP	GO:0048636	positive regulation of muscle organ development	4/144	87/18670	0.00460547	0.0276053	0.0198453	CDK1/GPC1/MYOG/IGF1	4
BP	GO:0010463	mesenchymal cell proliferation	3/144	44/18670	0.00472261	0.0282511	0.0203096	SOX9/VEGFA/IRS2	3
BP	GO:0071496	cellular response to external stimulus	8/144	339/18670	0.00484446	0.0289226	0.0207923	SOX9/ADORA2B/HDAC4/P2RX7/EGFR/GOT1/PRKAA2/DSC2	8
BP	GO:0055013	cardiac muscle cell development	4/144	89/18670	0.00499251	0.0297317	0.021374	CDK1/VEGFA/IGF1/PPARA	4
BP	GO:0045927	positive regulation of growth	7/144	270/18670	0.00501567	0.0297317	0.021374	CDK1/INS/AGRN/VEGFA/IGF1/INSR/EGFR	7
BP	GO:0042771	intrinsic apoptotic signaling pathway in response to DNA damage by p53 class mediator	3/144	45/18670	0.00503168	0.0297317	0.021374	MIF/DDIT4/CD44	3
BP	GO:0030879	mammary gland development	5/144	143/18670	0.00504975	0.0297317	0.021374	SOX9/VEGFA/IRS2/ELF3/HK2	5
BP	GO:0032310	prostaglandin secretion	2/144	14/18670	0.00505903	0.0297317	0.021374	MIF/P2RX7	2
BP	GO:0050930	induction of positive chemotaxis	2/144	14/18670	0.00505903	0.0297317	0.021374	ARTN/VEGFA	2
BP	GO:0060831	smoothened signaling pathway involved in dorsal/ventral neural tube patterning	2/144	14/18670	0.00505903	0.0297317	0.021374	PRKACB/PRKACA	2
BP	GO:0086069	bundle of His cell to Purkinje myocyte communication	2/144	14/18670	0.00505903	0.0297317	0.021374	PKP2/DSC2	2
BP	GO:1901617	organic hydroxy compound biosynthetic process	7/144	271/18670	0.00511625	0.0300093	0.0215736	SRD5A3/NSDHL/PGP/PRKAG2/CACNA1H/GOT1/PRKAA2	7
BP	GO:0031058	positive regulation of histone modification	4/144	90/18670	0.00519396	0.0303798	0.0218399	PAXIP1/OGT/VEGFA/PPARGC1A	4
BP	GO:0071322	cellular response to carbohydrate stimulus	5/144	144/18670	0.00519961	0.0303798	0.0218399	MLXIPL/IRS2/PPARGC1A/PRKACA/PRKAA2	5
BP	GO:0043588	skin development	9/144	419/18670	0.00526716	0.0307149	0.0220808	SOX9/COL5A1/ABCB6/MET/NSDHL/STMN1/PKP2/EGFR/DSC2	9
BP	GO:0061448	connective tissue development	7/144	273/18670	0.00532194	0.0309743	0.0222673	TGFBI/PAXIP1/SOX9/STC1/COL5A1/CD44/PPARGC1A	7
BP	GO:0048599	oocyte development	3/144	46/18670	0.00535268	0.0310931	0.0223527	AURKA/ANG/IGF1	3
BP	GO:0050900	leukocyte migration	10/144	499/18670	0.00538472	0.0311919	0.0224238	MIF/PPIA/NUP85/GPC1/ARTN/VEGFA/CD44/B4GALT1/SDC3/SDC2	10
BP	GO:0014909	smooth muscle cell migration	4/144	91/18670	0.0054008	0.0311919	0.0224238	IGFBP3/IGF1/HDAC4/PPARGC1A	4
BP	GO:0051899	membrane depolarization	4/144	91/18670	0.0054008	0.0311919	0.0224238	CACNA1H/P2RX7/DCN/GOT1	4
BP	GO:0045834	positive regulation of lipid metabolic process	5/144	146/18670	0.00550873	0.0316936	0.0227844	INS/MLXIPL/IRS2/PPARGC1A/PPARA	5
BP	GO:0051384	response to glucocorticoid	5/144	146/18670	0.00550873	0.0316936	0.0227844	DDIT4/STC1/AGL/EGFR/GOT1	5
BP	GO:0061614	pri-miRNA transcription by RNA polymerase II	3/144	47/18670	0.00568573	0.0325457	0.023397	SOX9/HDAC4/PPARA	3
BP	GO:1903115	regulation of actin filament-based movement	3/144	47/18670	0.00568573	0.0325457	0.023397	STC1/PKP2/DSC2	3
BP	GO:0071229	cellular response to acid chemical	6/144	209/18670	0.00568929	0.0325457	0.023397	SOX9/MYOG/VEGFA/EGFR/PPARGC1A/PRKAA2	6
BP	GO:0030238	male sex determination	2/144	15/18670	0.00580795	0.0327268	0.0235272	SOX9/INSR	2
BP	GO:0032352	positive regulation of hormone metabolic process	2/144	15/18670	0.00580795	0.0327268	0.0235272	ARNT/PPARGC1A	2
BP	GO:0034380	high-density lipoprotein particle assembly	2/144	15/18670	0.00580795	0.0327268	0.0235272	PRKACB/PRKACA	2
BP	GO:0035864	response to potassium ion	2/144	15/18670	0.00580795	0.0327268	0.0235272	CACNA1H/PPARGC1A	2
BP	GO:0043518	negative regulation of DNA damage response, signal transduction by p53 class mediator	2/144	15/18670	0.00580795	0.0327268	0.0235272	MIF/CD44	2
BP	GO:0050651	dermatan sulfate proteoglycan biosynthetic process	2/144	15/18670	0.00580795	0.0327268	0.0235272	VCAN/DCN	2
BP	GO:2001028	positive regulation of endothelial cell chemotaxis	2/144	15/18670	0.00580795	0.0327268	0.0235272	MET/VEGFA	2
BP	GO:2001256	regulation of store-operated calcium entry	2/144	15/18670	0.00580795	0.0327268	0.0235272	STC2/HOMER1	2
BP	GO:0009612	response to mechanical stimulus	6/144	210/18670	0.0058203	0.0327351	0.0235332	SOX9/HDAC4/P2RX7/DCN/EGFR/GOT1	6
BP	GO:0009311	oligosaccharide metabolic process	3/144	48/18670	0.00603095	0.0337307	0.0242489	IDUA/FUT8/B4GALT1	3
BP	GO:0035272	exocrine system development	3/144	48/18670	0.00603095	0.0337307	0.0242489	SOX9/INSR/EGFR	3
BP	GO:0090199	regulation of release of cytochrome c from mitochondria	3/144	48/18670	0.00603095	0.0337307	0.0242489	BIK/IGF1/FAM162A	3
BP	GO:0060047	heart contraction	7/144	280/18670	0.00609111	0.034004	0.0244453	NUP155/STC1/HDAC4/CACNA1H/PKP2/PRKACA/DSC2	7
BP	GO:0055006	cardiac cell development	4/144	95/18670	0.00628314	0.035011	0.0251693	CDK1/VEGFA/IGF1/PPARA	4
BP	GO:0003254	regulation of membrane depolarization	3/144	49/18670	0.00638845	0.0355321	0.0255439	P2RX7/DCN/GOT1	3
BP	GO:0008585	female gonad development	4/144	96/18670	0.00651778	0.0360657	0.0259275	NUP107/VEGFA/ANG/INSR	4
BP	GO:0072593	reactive oxygen species metabolic process	7/144	284/18670	0.00656637	0.0360657	0.0259275	INS/DDIT4/HDAC4/P2RX7/INSR/EGFR/HK2	7
BP	GO:0050673	epithelial cell proliferation	9/144	434/18670	0.00658374	0.0360657	0.0259275	SOX9/VEGFA/IGFBP3/ANG/IGF1/TGFA/B4GALT1/ARNT/EGFR	9
BP	GO:0006103	2-oxoglutarate metabolic process	2/144	16/18670	0.00660426	0.0360657	0.0259275	GOT1/OGDH	2
BP	GO:0030214	hyaluronan catabolic process	2/144	16/18670	0.00660426	0.0360657	0.0259275	HMMR/CD44	2
BP	GO:0032305	positive regulation of icosanoid secretion	2/144	16/18670	0.00660426	0.0360657	0.0259275	MIF/P2RX7	2
BP	GO:0045722	positive regulation of gluconeogenesis	2/144	16/18670	0.00660426	0.0360657	0.0259275	PPARGC1A/PPARA	2
BP	GO:0048012	hepatocyte growth factor receptor signaling pathway	2/144	16/18670	0.00660426	0.0360657	0.0259275	MET/STMN1	2
BP	GO:0071871	response to epinephrine	2/144	16/18670	0.00660426	0.0360657	0.0259275	PPARGC1A/PRKACA	2
BP	GO:1902166	negative regulation of intrinsic apoptotic signaling pathway in response to DNA damage by p53 class mediator	2/144	16/18670	0.00660426	0.0360657	0.0259275	MIF/CD44	2
BP	GO:0002931	response to ischemia	3/144	50/18670	0.00675834	0.0367737	0.0264365	P2RX7/PPARGC1A/HK2	3
BP	GO:0031113	regulation of microtubule polymerization	3/144	50/18670	0.00675834	0.0367737	0.0264365	FKBP4/MET/STMN1	3
BP	GO:0032886	regulation of microtubule-based process	6/144	218/18670	0.00694913	0.0377435	0.0271337	FKBP4/RAE1/AURKA/MET/STMN1/PRKAA2	6
BP	GO:2001243	negative regulation of intrinsic apoptotic signaling pathway	4/144	98/18670	0.00700436	0.037975	0.0273001	INS/MIF/ENO1/CD44	4
BP	GO:0019932	second-messenger-mediated signaling	9/144	439/18670	0.00707467	0.0382872	0.0275245	INS/SOX9/VEGFA/ADORA2B/IGF1/HDAC4/P2RX7/EGFR/PRKACA	9
BP	GO:0007566	embryo implantation	3/144	51/18670	0.00714073	0.0383687	0.0275831	FKBP4/STC2/STC1	3
BP	GO:0009994	oocyte differentiation	3/144	51/18670	0.00714073	0.0383687	0.0275831	AURKA/ANG/IGF1	3
BP	GO:0048146	positive regulation of fibroblast proliferation	3/144	51/18670	0.00714073	0.0383687	0.0275831	MIF/IGF1/EGFR	3
BP	GO:0048641	regulation of skeletal muscle tissue development	3/144	51/18670	0.00714073	0.0383687	0.0275831	GPC1/MYOG/HDAC4	3
BP	GO:0018108	peptidyl-tyrosine phosphorylation	8/144	363/18670	0.00722467	0.0387505	0.0278576	MIF/MET/VEGFA/CD44/IGF1/TGFA/INSR/EGFR	8
BP	GO:0019395	fatty acid oxidation	4/144	99/18670	0.00725641	0.0387825	0.0278806	IRS2/PRKAG2/PPARGC1A/PPARA	4
BP	GO:0043648	dicarboxylic acid metabolic process	4/144	99/18670	0.00725641	0.0387825	0.0278806	ME1/ME2/GOT1/OGDH	4
BP	GO:0003015	heart process	7/144	290/18670	0.00733038	0.0391084	0.0281148	NUP155/STC1/HDAC4/CACNA1H/PKP2/PRKACA/DSC2	7
BP	GO:1905952	regulation of lipid localization	5/144	157/18670	0.00744453	0.0394338	0.0283488	MIF/IRS2/NCOR1/P2RX7/PPARA	5
BP	GO:0015732	prostaglandin transport	2/144	17/18670	0.00744719	0.0394338	0.0283488	MIF/P2RX7	2
BP	GO:0060046	regulation of acrosome reaction	2/144	17/18670	0.00744719	0.0394338	0.0283488	CACNA1H/B4GALT1	2
BP	GO:0060263	regulation of respiratory burst	2/144	17/18670	0.00744719	0.0394338	0.0283488	INS/INSR	2
BP	GO:0006869	lipid transport	8/144	365/18670	0.00745691	0.0394338	0.0283488	MIF/IRS2/PRKAG2/NCOR1/VLDLR/P2RX7/PRKAA2/PPARA	8
BP	GO:0046580	negative regulation of Ras protein signal transduction	3/144	52/18670	0.00753571	0.0397806	0.0285981	MET/STMN1/PPP2CB	3
BP	GO:0006520	cellular amino acid metabolic process	8/144	366/18670	0.00757513	0.0398489	0.0286472	INS/ERO1A/PLOD1/P4HA1/PLOD2/EGLN3/GOT1/OGDH	8
BP	GO:0018212	peptidyl-tyrosine modification	8/144	366/18670	0.00757513	0.0398489	0.0286472	MIF/MET/VEGFA/CD44/IGF1/TGFA/INSR/EGFR	8
BP	GO:0034440	lipid oxidation	4/144	101/18670	0.00777831	0.0407043	0.0292621	IRS2/PRKAG2/PPARGC1A/PPARA	4
BP	GO:0046545	development of primary female sexual characteristics	4/144	101/18670	0.00777831	0.0407043	0.0292621	NUP107/VEGFA/ANG/INSR	4
BP	GO:0048661	positive regulation of smooth muscle cell proliferation	4/144	101/18670	0.00777831	0.0407043	0.0292621	IGF1/HDAC4/EGFR/PPARGC1A	4
BP	GO:0045661	regulation of myoblast differentiation	3/144	53/18670	0.00794338	0.041424	0.0297795	SOX9/MYOG/IGFBP3	3
BP	GO:0070228	regulation of lymphocyte apoptotic process	3/144	53/18670	0.00794338	0.041424	0.0297795	MIF/IRS2/P2RX7	3
BP	GO:0048511	rhythmic process	7/144	295/18670	0.00801588	0.0417297	0.0299993	CDK1/OGT/NCOR1/EGFR/PPARGC1A/PRKAA2/PPARA	7
BP	GO:0007519	skeletal muscle tissue development	5/144	160/18670	0.00804541	0.0417391	0.030006	GPC1/MYOG/HOMER1/HDAC4/DCN	5
BP	GO:0046661	male sex differentiation	5/144	160/18670	0.00804541	0.0417391	0.030006	BIK/FKBP4/SOX9/CITED2/INSR	5
BP	GO:0032091	negative regulation of protein binding	4/144	103/18670	0.00832434	0.0425857	0.0306147	AURKA/MET/STMN1/PPARA	4
BP	GO:1905269	positive regulation of chromatin organization	4/144	103/18670	0.00832434	0.0425857	0.0306147	PAXIP1/OGT/VEGFA/PPARGC1A	4
BP	GO:0002902	regulation of B cell apoptotic process	2/144	18/18670	0.00833599	0.0425857	0.0306147	MIF/IRS2	2
BP	GO:0009312	oligosaccharide biosynthetic process	2/144	18/18670	0.00833599	0.0425857	0.0306147	FUT8/B4GALT1	2
BP	GO:0031998	regulation of fatty acid beta-oxidation	2/144	18/18670	0.00833599	0.0425857	0.0306147	IRS2/PPARA	2
BP	GO:0034199	activation of protein kinase A activity	2/144	18/18670	0.00833599	0.0425857	0.0306147	PRKACB/PRKACA	2
BP	GO:0090190	positive regulation of branching involved in ureteric bud morphogenesis	2/144	18/18670	0.00833599	0.0425857	0.0306147	SOX9/VEGFA	2
BP	GO:1902165	regulation of intrinsic apoptotic signaling pathway in response to DNA damage by p53 class mediator	2/144	18/18670	0.00833599	0.0425857	0.0306147	MIF/CD44	2
BP	GO:2000193	positive regulation of fatty acid transport	2/144	18/18670	0.00833599	0.0425857	0.0306147	MIF/P2RX7	2
BP	GO:0050994	regulation of lipid catabolic process	3/144	54/18670	0.00836382	0.0426555	0.0306649	INS/IRS2/PPARA	3
BP	GO:0051098	regulation of binding	8/144	373/18670	0.00844268	0.0429848	0.0309016	AURKA/MET/STMN1/IGF1/HDAC4/PPP2CB/PRKACA/PPARA	8
BP	GO:0031960	response to corticosteroid	5/144	162/18670	0.00846424	0.0430218	0.0309282	DDIT4/STC1/AGL/EGFR/GOT1	5
BP	GO:0001523	retinoid metabolic process	4/144	104/18670	0.00860653	0.0435977	0.0313422	AGRN/GPC1/SDC3/SDC2	4
BP	GO:0014812	muscle cell migration	4/144	104/18670	0.00860653	0.0435977	0.0313422	IGFBP3/IGF1/HDAC4/PPARGC1A	4
BP	GO:0042304	regulation of fatty acid biosynthetic process	3/144	55/18670	0.00879713	0.0444137	0.0319288	MLXIPL/PRKAG2/PRKAA2	3
BP	GO:0044273	sulfur compound catabolic process	3/144	55/18670	0.00879713	0.0444137	0.0319288	IDUA/VCAN/DCN	3
BP	GO:0033138	positive regulation of peptidyl-serine phosphorylation	4/144	105/18670	0.00889491	0.0446977	0.032133	MIF/VEGFA/CD44/EGFR	4
BP	GO:0045185	maintenance of protein location	4/144	105/18670	0.00889491	0.0446977	0.032133	KDELR3/SPAG4/MXI1/HK2	4
BP	GO:0007088	regulation of mitotic nuclear division	5/144	164/18670	0.00889795	0.0446977	0.032133	INS/AURKA/IGF1/TGFA/INSR	5
BP	GO:0050678	regulation of epithelial cell proliferation	8/144	378/18670	0.00910661	0.0456696	0.0328317	SOX9/VEGFA/ANG/IGF1/TGFA/B4GALT1/ARNT/EGFR	8
BP	GO:0086002	cardiac muscle cell action potential involved in contraction	3/144	56/18670	0.00924339	0.0460283	0.0330895	NUP155/PKP2/DSC2	3
BP	GO:0030949	positive regulation of vascular endothelial growth factor receptor signaling pathway	2/144	19/18670	0.0092699	0.0460283	0.0330895	VEGFA/ARNT	2
BP	GO:0032303	regulation of icosanoid secretion	2/144	19/18670	0.0092699	0.0460283	0.0330895	MIF/P2RX7	2
BP	GO:0042789	mRNA transcription by RNA polymerase II	2/144	19/18670	0.0092699	0.0460283	0.0330895	MYOG/ARNT	2
BP	GO:0098911	regulation of ventricular cardiac muscle cell action potential	2/144	19/18670	0.0092699	0.0460283	0.0330895	PKP2/DSC2	2
BP	GO:1903798	regulation of production of miRNAs involved in gene silencing by miRNA	2/144	19/18670	0.0092699	0.0460283	0.0330895	NCOR1/EGFR	2
BP	GO:0000302	response to reactive oxygen species	6/144	232/18670	0.00929424	0.0460731	0.0331218	CDK1/ANKZF1/MET/PPP2CB/EGFR/PPARGC1A	6
BP	GO:0035051	cardiocyte differentiation	5/144	167/18670	0.00957697	0.0473965	0.0340732	CDK1/VEGFA/IGF1/EGFR/PPARA	5
BP	GO:0014888	striated muscle adaptation	3/144	57/18670	0.00970267	0.0479398	0.0344637	MYOG/HDAC4/PPARGC1A	3
BP	GO:0006631	fatty acid metabolic process	8/144	383/18670	0.00980888	0.0483851	0.0347839	INS/MIF/MLXIPL/IRS2/PRKAG2/PPARGC1A/PRKAA2/PPARA	8
BP	GO:0046777	protein autophosphorylation	6/144	235/18670	0.00986234	0.0485692	0.0349162	INS/AURKA/VEGFA/INSR/EGFR/PRKACA	6
BP	GO:0008544	epidermis development	9/144	464/18670	0.00996373	0.0489883	0.0352175	SOX9/NSDHL/PLOD1/ELF3/INSR/PKP2/EGFR/PPARA/DSC2	9
BP	GO:0060538	skeletal muscle organ development	5/144	169/18670	0.010049	0.0493269	0.0354609	GPC1/MYOG/HOMER1/HDAC4/DCN	5
BP	GO:0051058	negative regulation of small GTPase mediated signal transduction	3/144	58/18670	0.010175	0.0497832	0.035789	MET/STMN1/PPP2CB	3
BP	GO:0071385	cellular response to glucocorticoid stimulus	3/144	58/18670	0.010175	0.0497832	0.035789	DDIT4/STC1/EGFR	3
BP	GO:0006071	glycerol metabolic process	2/144	20/18670	0.0102482	0.0500598	0.0359878	PGP/GOT1	2
BP	GO:0046578	regulation of Ras protein signal transduction	6/144	238/18670	0.0104548	0.0509862	0.0366538	OGT/MET/STMN1/IRS2/IGF1/PPP2CB	6
BP	GO:0007409	axonogenesis	9/144	468/18670	0.0104984	0.0511158	0.0367469	AGRN/GPC1/EFNA3/ARTN/STMN1/VEGFA/IRS2/VLDLR/EXT1	9
BP	GO:0001836	release of cytochrome c from mitochondria	3/144	59/18670	0.0106606	0.0515718	0.0370748	BIK/IGF1/FAM162A	3
BP	GO:0001885	endothelial cell development	3/144	59/18670	0.0106606	0.0515718	0.0370748	STC1/MET/VEGFA	3
BP	GO:0097755	positive regulation of blood vessel diameter	3/144	59/18670	0.0106606	0.0515718	0.0370748	INS/ADORA2B/EGFR	3
BP	GO:2000756	regulation of peptidyl-lysine acetylation	3/144	59/18670	0.0106606	0.0515718	0.0370748	PAXIP1/PPARGC1A/PRKAA2	3
BP	GO:0051262	protein tetramerization	5/144	172/18670	0.0107866	0.0520978	0.0374529	PKM/ME1/NUP58/HOMER1/INSR	5
BP	GO:0002115	store-operated calcium entry	2/144	21/18670	0.0112701	0.0539998	0.0388202	STC2/HOMER1	2
BP	GO:0035590	purinergic nucleotide receptor signaling pathway	2/144	21/18670	0.0112701	0.0539998	0.0388202	GPR87/P2RX7	2
BP	GO:0061213	positive regulation of mesonephros development	2/144	21/18670	0.0112701	0.0539998	0.0388202	SOX9/VEGFA	2
BP	GO:0070920	regulation of production of small RNA involved in gene silencing by RNA	2/144	21/18670	0.0112701	0.0539998	0.0388202	NCOR1/EGFR	2
BP	GO:0071459	protein localization to chromosome, centromeric region	2/144	21/18670	0.0112701	0.0539998	0.0388202	CDK1/CENPA	2
BP	GO:0030521	androgen receptor signaling pathway	3/144	61/18670	0.0116714	0.0556565	0.0400112	FKBP4/NCOR1/PPARGC1A	3
BP	GO:0034113	heterotypic cell-cell adhesion	3/144	61/18670	0.0116714	0.0556565	0.0400112	CD44/PKP2/DSC2	3
BP	GO:0071384	cellular response to corticosteroid stimulus	3/144	61/18670	0.0116714	0.0556565	0.0400112	DDIT4/STC1/EGFR	3
BP	GO:0051896	regulation of protein kinase B signaling	6/144	244/18670	0.0117149	0.0557755	0.0400968	INS/MET/IRS2/TGFA/INSR/EGFR	6
BP	GO:0042752	regulation of circadian rhythm	4/144	114/18670	0.0117773	0.055984	0.0402467	CDK1/PPARGC1A/PRKAA2/PPARA	4
BP	GO:0016311	dephosphorylation	9/144	478/18670	0.0119295	0.0566183	0.0407027	NANP/PFKFB3/IGFBP3/PGP/PFKFB4/PFKFB2/PPP2CB/BPNT1/LHPP	9
BP	GO:0048469	cell maturation	5/144	177/18670	0.0120969	0.0573222	0.0412087	AGRN/AURKA/VEGFA/ANG/PRKACA	5
BP	GO:0046660	female sex differentiation	4/144	115/18670	0.0121303	0.0573902	0.0412576	NUP107/VEGFA/ANG/INSR	4
BP	GO:0032922	circadian regulation of gene expression	3/144	62/18670	0.0121968	0.0576141	0.0414185	OGT/PPARGC1A/PPARA	3
BP	GO:0033233	regulation of protein sumoylation	2/144	22/18670	0.012335	0.0579033	0.0416265	HDAC4/ARNT	2
BP	GO:0035024	negative regulation of Rho protein signal transduction	2/144	22/18670	0.012335	0.0579033	0.0416265	MET/STMN1	2
BP	GO:0045663	positive regulation of myoblast differentiation	2/144	22/18670	0.012335	0.0579033	0.0416265	MYOG/IGFBP3	2
BP	GO:0090189	regulation of branching involved in ureteric bud morphogenesis	2/144	22/18670	0.012335	0.0579033	0.0416265	SOX9/VEGFA	2
BP	GO:0070252	actin-mediated cell contraction	4/144	116/18670	0.0124901	0.058499	0.0420547	NUP155/STC1/PKP2/DSC2	4
BP	GO:0010876	lipid localization	8/144	400/18670	0.0125008	0.058499	0.0420547	MIF/IRS2/PRKAG2/NCOR1/VLDLR/P2RX7/PRKAA2/PPARA	8
BP	GO:0015711	organic anion transport	9/144	482/18670	0.0125412	0.058597	0.0421251	MIF/PPFIA4/IRS2/PRKAG2/NCOR1/P2RX7/PRKAA2/PPARA/SLC35A3	9
BP	GO:0016049	cell growth	9/144	484/18670	0.0128557	0.0598847	0.0430508	INS/SOX9/AURKA/ENO1/VEGFA/IGFBP3/IGF1/EGFR/PPARA	9
BP	GO:0051153	regulation of striated muscle cell differentiation	4/144	117/18670	0.0128566	0.0598847	0.0430508	MYOG/IGF1/HDAC4/PPARA	4
BP	GO:1901796	regulation of signal transduction by p53 class mediator	5/144	180/18670	0.0129329	0.060147	0.0432395	MIF/AURKA/CD44/PRKAG2/PRKAA2	5
BP	GO:0043312	neutrophil degranulation	9/144	485/18670	0.0130151	0.0604358	0.0434471	MIF/PPIA/PKM/ALDOC/GPI/CD44/B4GALT1/AGL/PGM1	9
BP	GO:0009068	aspartate family amino acid catabolic process	2/144	23/18670	0.0134421	0.0619406	0.0445289	GOT1/OGDH	2
BP	GO:0061436	establishment of skin barrier	2/144	23/18670	0.0134421	0.0619406	0.0445289	MET/STMN1	2
BP	GO:0071157	negative regulation of cell cycle arrest	2/144	23/18670	0.0134421	0.0619406	0.0445289	MIF/MLXIPL	2
BP	GO:0090140	regulation of mitochondrial fission	2/144	23/18670	0.0134421	0.0619406	0.0445289	DCN/PPARGC1A	2
BP	GO:1902254	negative regulation of intrinsic apoptotic signaling pathway by p53 class mediator	2/144	23/18670	0.0134421	0.0619406	0.0445289	MIF/CD44	2
BP	GO:0002283	neutrophil activation involved in immune response	9/144	488/18670	0.0135022	0.0621226	0.0446597	MIF/PPIA/PKM/ALDOC/GPI/CD44/B4GALT1/AGL/PGM1	9
BP	GO:2001233	regulation of apoptotic signaling pathway	8/144	406/18670	0.0135697	0.0623378	0.0448144	BIK/INS/MIF/RBCK1/ENO1/CD44/IGF1/FAM162A	8
BP	GO:0048639	positive regulation of developmental growth	5/144	184/18670	0.0141073	0.0647085	0.0465187	CDK1/AGRN/VEGFA/IGF1/INSR	5
BP	GO:0001655	urogenital system development	7/144	330/18670	0.014208	0.0650715	0.0467796	FKBP4/SOX9/NUP85/NUP107/NUP93/VEGFA/DCN	7
BP	GO:0043618	regulation of transcription from RNA polymerase II promoter in response to stress	4/144	121/18670	0.0143911	0.0655274	0.0471074	VEGFA/ARNT/CITED2/EGLN3	4
BP	GO:0046718	viral entry into host cell	4/144	121/18670	0.0143911	0.0655274	0.0471074	CDK1/PPIA/CLDN9/EGFR	4
BP	GO:0008202	steroid metabolic process	7/144	331/18670	0.0144242	0.0655274	0.0471074	SRD5A3/NSDHL/PRKAG2/VLDLR/CACNA1H/PPARGC1A/PRKAA2	7
BP	GO:1901607	alpha-amino acid biosynthetic process	3/144	66/18670	0.0144329	0.0655274	0.0471074	PLOD1/PLOD2/GOT1	3
BP	GO:1905207	regulation of cardiocyte differentiation	3/144	66/18670	0.0144329	0.0655274	0.0471074	IGF1/EGFR/PPARA	3
BP	GO:0050730	regulation of peptidyl-tyrosine phosphorylation	6/144	256/18670	0.0145504	0.0655274	0.0471074	MIF/VEGFA/CD44/IGF1/TGFA/EGFR	6
BP	GO:0001783	B cell apoptotic process	2/144	24/18670	0.0145907	0.0655274	0.0471074	MIF/IRS2	2
BP	GO:0021904	dorsal/ventral neural tube patterning	2/144	24/18670	0.0145907	0.0655274	0.0471074	PRKACB/PRKACA	2
BP	GO:0035588	G protein-coupled purinergic receptor signaling pathway	2/144	24/18670	0.0145907	0.0655274	0.0471074	GPR87/ADORA2B	2
BP	GO:0046697	decidualization	2/144	24/18670	0.0145907	0.0655274	0.0471074	STC2/STC1	2
BP	GO:0050996	positive regulation of lipid catabolic process	2/144	24/18670	0.0145907	0.0655274	0.0471074	IRS2/PPARA	2
BP	GO:0086064	cell communication by electrical coupling involved in cardiac conduction	2/144	24/18670	0.0145907	0.0655274	0.0471074	PKP2/PRKACA	2
BP	GO:2001026	regulation of endothelial cell chemotaxis	2/144	24/18670	0.0145907	0.0655274	0.0471074	MET/VEGFA	2
BP	GO:0048662	negative regulation of smooth muscle cell proliferation	3/144	67/18670	0.0150257	0.0673807	0.0484397	IGFBP3/ANG/PPARGC1A	3
BP	GO:0042119	neutrophil activation	9/144	498/18670	0.0152243	0.0681695	0.0490068	MIF/PPIA/PKM/ALDOC/GPI/CD44/B4GALT1/AGL/PGM1	9
BP	GO:0003007	heart morphogenesis	6/144	259/18670	0.0153279	0.0684331	0.0491963	SOX9/COL5A1/VEGFA/CITED2/INSR/PKP2	6
BP	GO:0006367	transcription initiation from RNA polymerase II promoter	5/144	188/18670	0.0153514	0.0684331	0.0491963	CDK1/PAXIP1/SOX9/PPARGC1A/PPARA	5
BP	GO:0051783	regulation of nuclear division	5/144	188/18670	0.0153514	0.0684331	0.0491963	INS/AURKA/IGF1/TGFA/INSR	5
BP	GO:0002446	neutrophil mediated immunity	9/144	499/18670	0.015405	0.0685706	0.0492951	MIF/PPIA/PKM/ALDOC/GPI/CD44/B4GALT1/AGL/PGM1	9
BP	GO:0019751	polyol metabolic process	4/144	124/18670	0.0156151	0.0694029	0.0498935	MIOX/GALK1/PGP/GOT1	4
CC	GO:0018995	host	13/144	73/19717	5.74864e-15	6.78424e-13	5.85889e-13	NUP35/NUP37/RAE1/NDC1/NUP205/NUP85/NUP43/NUP107/NUP155/NUP58/NUP93/NUP210/NUP188	13
CC	GO:0043657	host cell	13/144	73/19717	5.74864e-15	6.78424e-13	5.85889e-13	NUP35/NUP37/RAE1/NDC1/NUP205/NUP85/NUP43/NUP107/NUP155/NUP58/NUP93/NUP210/NUP188	13
CC	GO:0044215	other organism	13/144	77/19717	1.19441e-14	6.78424e-13	5.85889e-13	NUP35/NUP37/RAE1/NDC1/NUP205/NUP85/NUP43/NUP107/NUP155/NUP58/NUP93/NUP210/NUP188	13
CC	GO:0044216	other organism cell	13/144	77/19717	1.19441e-14	6.78424e-13	5.85889e-13	NUP35/NUP37/RAE1/NDC1/NUP205/NUP85/NUP43/NUP107/NUP155/NUP58/NUP93/NUP210/NUP188	13
CC	GO:0044217	other organism part	13/144	77/19717	1.19441e-14	6.78424e-13	5.85889e-13	NUP35/NUP37/RAE1/NDC1/NUP205/NUP85/NUP43/NUP107/NUP155/NUP58/NUP93/NUP210/NUP188	13
CC	GO:0005643	nuclear pore	13/144	89/19717	8.4843e-14	4.0159e-12	3.46814e-12	NUP35/NUP37/RAE1/NDC1/NUP205/NUP85/NUP43/NUP107/NUP155/NUP58/NUP93/NUP210/NUP188	13
CC	GO:0005635	nuclear envelope	17/144	464/19717	5.17845e-08	2.10097e-06	1.81441e-06	NUP35/NUP37/RAE1/NDC1/NUP205/NUP85/NUP43/NUP107/NUP155/SPAG4/NUP58/NUP93/NUP210/NUP188/P2RX7/INSR/EGFR	17
CC	GO:0031080	nuclear pore outer ring	4/144	10/19717	5.53802e-07	1.966e-05	1.69784e-05	NUP37/NUP85/NUP43/NUP107	4
CC	GO:0031965	nuclear membrane	12/144	296/19717	1.86394e-06	5.88177e-05	5.07951e-05	NUP35/NDC1/NUP205/NUP85/NUP107/NUP155/SPAG4/NUP58/NUP93/NUP210/P2RX7/EGFR	12
CC	GO:0043202	lysosomal lumen	7/144	95/19717	6.18853e-06	0.000175754	0.000151782	AGRN/IDUA/VCAN/GPC1/DCN/SDC3/SDC2	7
CC	GO:0005796	Golgi lumen	7/144	102/19717	9.91218e-06	0.000255914	0.000221008	INS/AGRN/VCAN/GPC1/DCN/SDC3/SDC2	7
CC	GO:1904813	ficolin-1-rich granule lumen	7/144	124/19717	3.53591e-05	0.000836831	0.00072269	MIF/PPIA/PKM/ALDOC/GPI/AGL/PGM1	7
CC	GO:0031983	vesicle lumen	10/144	339/19717	0.000198246	0.00433092	0.0037402	INS/MIF/PPIA/PKM/ALDOC/GPI/VEGFA/IGF1/AGL/EGFR	10
CC	GO:0000779	condensed chromosome, centromeric region	6/144	118/19717	0.000230232	0.00467041	0.00403338	NUP37/CENPA/AURKA/NUP85/NUP43/NUP107	6
CC	GO:0005775	vacuolar lumen	7/144	172/19717	0.00027437	0.00519474	0.00448619	AGRN/IDUA/VCAN/GPC1/DCN/SDC3/SDC2	7
CC	GO:0101002	ficolin-1-rich granule	7/144	185/19717	0.000426177	0.00756464	0.00653285	MIF/PPIA/PKM/ALDOC/GPI/AGL/PGM1	7
CC	GO:0000775	chromosome, centromeric region	7/144	193/19717	0.000548823	0.00893671	0.00771776	NUP37/CENPA/AURKA/NUP85/NUP43/NUP107/PPP2CB	7
CC	GO:0032580	Golgi cisterna membrane	5/144	92/19717	0.000572402	0.00893671	0.00771776	FUT8/CHPF/B3GALT6/B4GALT1/B4GALT4	5
CC	GO:0034774	secretory granule lumen	9/144	321/19717	0.000597878	0.00893671	0.00771776	INS/MIF/PPIA/PKM/ALDOC/GPI/VEGFA/IGF1/AGL	9
CC	GO:0030057	desmosome	3/144	25/19717	0.000779906	0.0110134	0.00951122	B4GALT1/PKP2/DSC2	3
CC	GO:0062023	collagen-containing extracellular matrix	10/144	406/19717	0.000814373	0.0110134	0.00951122	TGFBI/AGRN/PKM/VCAN/GPC1/COL5A1/ANG/DCN/SDC3/SDC2	10
CC	GO:0060205	cytoplasmic vesicle lumen	9/144	338/19717	0.00086215	0.0111296	0.00961153	INS/MIF/PPIA/PKM/ALDOC/GPI/VEGFA/IGF1/AGL	9
CC	GO:0000777	condensed chromosome kinetochore	5/144	105/19717	0.00104205	0.012867	0.011112	NUP37/CENPA/NUP85/NUP43/NUP107	5
CC	GO:0031985	Golgi cisterna	5/144	116/19717	0.00162375	0.0192143	0.0165935	FUT8/CHPF/B3GALT6/B4GALT1/B4GALT4	5
CC	GO:0005788	endoplasmic reticulum lumen	8/144	309/19717	0.00198634	0.0225648	0.0194871	INS/STC2/VCAN/COL5A1/ERO1A/IGFBP3/P4HA1/SDC2	8
CC	GO:0034399	nuclear periphery	5/144	131/19717	0.00276198	0.0301693	0.0260543	NUP35/PAXIP1/NUP205/NUP107/NUP93	5
CC	GO:0061695	transferase complex, transferring phosphorus-containing groups	7/144	259/19717	0.00297584	0.0313014	0.027032	CDK1/PKM/POLR3K/PRPS1/PRKAG2/INSR/PRKAA2	7
CC	GO:0000776	kinetochore	5/144	135/19717	0.00314401	0.0318893	0.0275397	NUP37/CENPA/NUP85/NUP43/NUP107	5
CC	GO:0005952	cAMP-dependent protein kinase complex	2/144	13/19717	0.00391926	0.0383818	0.0331466	PRKACB/PRKACA	2
CC	GO:0098687	chromosomal region	8/144	349/19717	0.00417204	0.0394953	0.0341082	NUP37/CDK1/CENPA/AURKA/NUP85/NUP43/NUP107/PPP2CB	8
CC	GO:0031588	nucleotide-activated protein kinase complex	2/144	14/19717	0.00455066	0.0416899	0.0360035	PRKAG2/PRKAA2	2
CC	GO:0005795	Golgi stack	5/144	149/19717	0.00478298	0.042449	0.036659	FUT8/CHPF/B3GALT6/B4GALT1/B4GALT4	5
CC	GO:0005604	basement membrane	4/144	95/19717	0.00519759	0.0447307	0.0386296	TGFBI/AGRN/COL5A1/ANG	4
CC	GO:0000793	condensed chromosome	6/144	223/19717	0.00598707	0.0500096	0.0431885	NUP37/CENPA/AURKA/NUP85/NUP43/NUP107	6
MF	GO:0017056	structural constituent of nuclear pore	9/144	28/17697	7.35683e-13	2.83974e-10	2.29223e-10	NUP35/NDC1/NUP205/NUP85/NUP107/NUP155/NUP58/NUP93/NUP188	9
MF	GO:0019200	carbohydrate kinase activity	8/144	21/17697	2.9395e-12	5.67323e-10	4.57943e-10	HKDC1/PFKFB3/GALK1/PFKFB4/PFKFB2/GCK/GNE/HK2	8
MF	GO:0048029	monosaccharide binding	10/144	75/17697	4.90224e-10	6.30755e-08	5.09145e-08	HKDC1/GPI/GALK1/PLOD1/P4HA1/PLOD2/EGLN3/GCK/HK2/UGP2	10
MF	GO:0030246	carbohydrate binding	13/144	271/17697	3.37372e-07	3.25564e-05	2.62795e-05	HKDC1/GCKR/VCAN/GPI/GALK1/PLOD1/P4HA1/PLOD2/AGL/EGLN3/GCK/HK2/UGP2	13
MF	GO:0031406	carboxylic acid binding	11/144	193/17697	5.17034e-07	3.99151e-05	3.22194e-05	AGRN/VCAN/HMMR/PLOD1/CD44/P4HA1/PLOD2/PC/EGLN3/GOT1/PPARA	11
MF	GO:0016853	isomerase activity	10/144	158/17697	6.6615e-07	4.28557e-05	3.45931e-05	FKBP4/MIF/PPIA/GPI/GNPDA1/ERO1A/TSTA3/GNE/MPI/PGM1	10
MF	GO:0043177	organic acid binding	11/144	205/17697	9.40056e-07	5.18374e-05	4.18431e-05	AGRN/VCAN/HMMR/PLOD1/CD44/P4HA1/PLOD2/PC/EGLN3/GOT1/PPARA	11
MF	GO:0005536	glucose binding	4/144	11/17697	1.32732e-06	6.40432e-05	5.16957e-05	HKDC1/GCK/HK2/UGP2	4
MF	GO:0008146	sulfotransferase activity	6/144	52/17697	3.91135e-06	0.000167754	0.000135411	CHST4/HS6ST2/CHST1/GAL3ST1/CHST6/CHST2	6
MF	GO:0031418	L-ascorbic acid binding	4/144	20/17697	1.84075e-05	0.00071053	0.000573539	PLOD1/P4HA1/PLOD2/EGLN3	4
MF	GO:0016782	transferase activity, transferring sulfur-containing groups	6/144	69/17697	2.05611e-05	0.000721509	0.000582401	CHST4/HS6ST2/CHST1/GAL3ST1/CHST6/CHST2	6
MF	GO:0050662	coenzyme binding	11/144	291/17697	2.65466e-05	0.000853915	0.00068928	ME1/GAPDHS/PLOD1/TSTA3/P4HA1/PLOD2/ME2/PC/EGLN3/GOT1/OGDH	11
MF	GO:0016860	intramolecular oxidoreductase activity	5/144	47/17697	3.87639e-05	0.00115099	0.000929078	MIF/GPI/GNPDA1/ERO1A/MPI	5
MF	GO:0019203	carbohydrate phosphatase activity	3/144	10/17697	6.0721e-05	0.00150961	0.00121856	PFKFB3/PFKFB4/PFKFB2	3
MF	GO:0050308	sugar-phosphatase activity	3/144	10/17697	6.0721e-05	0.00150961	0.00121856	PFKFB3/PFKFB4/PFKFB2	3
MF	GO:0000287	magnesium ion binding	9/144	213/17697	6.25745e-05	0.00150961	0.00121856	PKM/ENO1/ENO3/PRPS1/PGP/PRKACB/LHPP/PRKACA/PGM1	9
MF	GO:0050840	extracellular matrix binding	5/144	57/17697	9.9129e-05	0.00225081	0.00181685	TGFBI/AGRN/GPC1/VEGFA/DCN	5
MF	GO:0019842	vitamin binding	7/144	138/17697	0.000136086	0.0029183	0.00235565	PLOD1/P4HA1/PLOD2/PC/EGLN3/GOT1/OGDH	7
MF	GO:0043531	ADP binding	4/144	38/17697	0.000250309	0.00508523	0.00410479	PKM/ME1/PGK2/PRKAG2	4
MF	GO:0005159	insulin-like growth factor receptor binding	3/144	16/17697	0.000273387	0.00527638	0.00425909	INS/IGF1/INSR	3
MF	GO:0035173	histone kinase activity	3/144	17/17697	0.000329996	0.00606563	0.00489617	CDK1/AURKA/PRKAA2	3
MF	GO:0016758	transferase activity, transferring hexosyl groups	8/144	216/17697	0.000393478	0.00690376	0.00557271	FUT8/CHPF/OGT/B3GALT6/B4GALT1/AGL/B4GALT4/EXT1	8
MF	GO:0016706	oxidoreductase activity, acting on paired donors, with incorporation or reduction of molecular oxygen, 2-oxoglutarate as one donor, and incorporation of one atom each of oxygen into both donors	4/144	45/17697	0.00048346	0.00811372	0.00654939	PLOD1/P4HA1/PLOD2/EGLN3	4
MF	GO:0005539	glycosaminoglycan binding	8/144	229/17697	0.000579337	0.00931767	0.00752122	AGRN/VCAN/HMMR/COL5A1/VEGFA/CD44/ANG/DCN	8
MF	GO:0005540	hyaluronic acid binding	3/144	21/17697	0.000630225	0.00973067	0.00785459	VCAN/HMMR/CD44	3
MF	GO:0005158	insulin receptor binding	3/144	22/17697	0.000725401	0.0107694	0.00869307	INS/IRS2/IGF1	3
MF	GO:0016830	carbon-carbon lyase activity	4/144	51/17697	0.000780857	0.0111634	0.00901106	ME1/ALDOC/ME2/GOT1	4
MF	GO:0035250	UDP-galactosyltransferase activity	3/144	23/17697	0.00082926	0.0114319	0.00922785	B3GALT6/B4GALT1/B4GALT4	3
MF	GO:0035586	purinergic receptor activity	3/144	25/17697	0.00106422	0.0141651	0.0114341	GPR87/ADORA2B/P2RX7	3
MF	GO:0008194	UDP-glycosyltransferase activity	6/144	151/17697	0.00148183	0.0190662	0.0153903	CHPF/OGT/B3GALT6/B4GALT1/B4GALT4/EXT1	6
MF	GO:0004714	transmembrane receptor protein tyrosine kinase activity	4/144	62/17697	0.00162684	0.020147	0.0162626	EFNA3/MET/INSR/EGFR	4
MF	GO:0016791	phosphatase activity	8/144	270/17697	0.00167021	0.020147	0.0162626	NANP/PFKFB3/PGP/PFKFB4/PFKFB2/PPP2CB/BPNT1/LHPP	8
MF	GO:0016757	transferase activity, transferring glycosyl groups	8/144	280/17697	0.00209604	0.0245173	0.0197903	FUT8/CHPF/OGT/B3GALT6/B4GALT1/AGL/B4GALT4/EXT1	8
MF	GO:0004690	cyclic nucleotide-dependent protein kinase activity	2/144	10/17697	0.00283492	0.0301736	0.0243561	PRKACB/PRKACA	2
MF	GO:0004691	cAMP-dependent protein kinase activity	2/144	10/17697	0.00283492	0.0301736	0.0243561	PRKACB/PRKACA	2
MF	GO:0016831	carboxy-lyase activity	3/144	35/17697	0.00285385	0.0301736	0.0243561	ME1/ME2/GOT1	3
MF	GO:0016616	oxidoreductase activity, acting on the CH-OH group of donors, NAD or NADP as acceptor	5/144	119/17697	0.00289229	0.0301736	0.0243561	ME1/MIOX/NSDHL/TSTA3/ME2	5
MF	GO:0008378	galactosyltransferase activity	3/144	36/17697	0.0030949	0.0314377	0.0253765	B3GALT6/B4GALT1/B4GALT4	3
MF	GO:0030955	potassium ion binding	2/144	11/17697	0.00344645	0.0341111	0.0275344	PKM/HDAC4	2
MF	GO:0019199	transmembrane receptor protein kinase activity	4/144	79/17697	0.00393989	0.0360888	0.0291308	EFNA3/MET/INSR/EGFR	4
MF	GO:0016614	oxidoreductase activity, acting on CH-OH group of donors	5/144	128/17697	0.00395359	0.0360888	0.0291308	ME1/MIOX/NSDHL/TSTA3/ME2	5
MF	GO:0016857	racemase and epimerase activity, acting on carbohydrates and derivatives	2/144	12/17697	0.00411375	0.0360888	0.0291308	TSTA3/GNE	2
MF	GO:0031543	peptidyl-proline dioxygenase activity	2/144	12/17697	0.00411375	0.0360888	0.0291308	P4HA1/EGLN3	2
MF	GO:0031994	insulin-like growth factor I binding	2/144	12/17697	0.00411375	0.0360888	0.0291308	IGFBP3/INSR	2
MF	GO:0016829	lyase activity	6/144	187/17697	0.00429987	0.0368833	0.0297722	ME1/ALDOC/ENO1/ENO3/ME2/GOT1	6
MF	GO:0086080	protein binding involved in heterotypic cell-cell adhesion	2/144	13/17697	0.00483585	0.0405791	0.0327554	PKP2/DSC2	2
MF	GO:0004712	protein serine/threonine/tyrosine kinase activity	3/144	43/17697	0.00513236	0.0421508	0.0340241	AURKA/PRKACA/PRKAA2	3
MF	GO:0019838	growth factor binding	5/144	137/17697	0.00526832	0.0423661	0.0341979	GPC1/COL5A1/IGFBP3/INSR/EGFR	5
MF	GO:0051213	dioxygenase activity	4/144	91/17697	0.00650353	0.0512319	0.0413544	PLOD1/P4HA1/PLOD2/EGLN3	4
MF	GO:0031420	alkali metal ion binding	2/144	16/17697	0.00732191	0.0565251	0.045627	PKM/HDAC4	2
MF	GO:0051018	protein kinase A binding	3/144	50/17697	0.00782147	0.0591978	0.0477844	SOX9/PRKACB/PRKACA	3
MF	GO:0005506	iron ion binding	5/144	152/17697	0.00810313	0.0601502	0.0485532	MIOX/PLOD1/P4HA1/PLOD2/EGLN3	5
